# Supplementary material for: Improved logistic regression model based on a spatially weighted technique(ILRBSWT v1.0) and its application to mineral prospectivity mapping
Source: Copernicus journal article supplement (doi:10.5194/gmd-2017-278), 2018-01-16
Supplement: Supplementary file [file gmd-2017-278-AC1-supplement.pdf]

## Responses and proposed changes to referees for gmd-2017-278

Daojun Zhang, Na Ren, and Xianhui Hou

Dear Editor,

We appreciate both you and the two anonymous reviewers giving our work (ID: gmd-2017-278) positive comments and giving us the chance to make a further modification of our manuscript. We have carefully modified the manuscript according to the suggestions and comments provided by the reviewers and hope our modification could meet with the requirement of GMD. Following are the responds to the reviewers' suggestions and comments one by one (all suggestions and comments are colored in red, and our proposed changes to the manuscript are colored blue). At the end of this file we attached the comparison between the newest edition and the original edition.

### **Response to Anonymous Referee #1:**

*1. Line 52-53, these references are so old, please cite more recent references.*

Thank you for your comments and suggestions. Here we mainly listed the method research literatures. Unlike application researches, the method researches especially original models (not including modified models) are generally older. Anyway, we have added more recent models here as references, please see lines 57-64 in the comparison edition attached. The new statement is as following.

“(1) Locations are introduced as direct or indirect independent variables. This type of model is still a global model, but space coordinates or distance weights are employed to adjust the regression estimation between the dependent variable and independent variables (Agterberg, 1964; Agterberg and Cabilio, 1969; Agterberg, 1970; Agterberg and Kelly, 1971; Agterberg, 1971; Casetti, 1972; Lesage & Pace, 2009, 2011).”

*2. Line 57-61, it is better to show two recent examples.*

Thank you for your comments and suggestions. We have added more references here, which are about the new applications of models including locations as direct or indirect independent variables, please see lines 64-71 in the comparison edition

attached. The new statement is as following.

“For example, Reddy et al. (1991) performed logistic regression by including trend variables for mapping to map the base-metal potential in the Snow Lake area, Manitoba, Canada. In addition, Casetti (1972) developed a ; Helbich & Griffith (2016) compared the spatial expansion method (SEM) to other methods in modeling the house price variation locally, where the regression parameters are themselves functions of the x and y coordinates as well as and their combinations; Yu & Liu (2016) used the spatial lag model (SLM) and spatial error model to control spatial effects in modeling the relationship between PM<sub>2.5</sub> concentrations and per capita GDP in China.”

*3. Line 63-67, there are various applications of GWR in Geosciences, they should be cited here.*

Thank you for your suggestion and we have added some new literatures about the application of GWR in different fields here, please see lines 74-78 in the comparison edition attached. The new statement is as following.

“GWR models were first developed at the end of the 20th century by Brunson et al. (1996) and Fotheringham et al. (1996, 1997, 2002) for modeling spatially heterogeneous processes, and it has been used widely in the field of geography/geosciences (e.g., Buyantuyev & Wu, 2010; Barbet-Massin et al., 2012; Ma et al., 2014; Brauer et al., 2015).”

## Response to Anonymous Referee #2:

*The manuscript presents something that is technically sound. So it can be accepted for publication after addressing the following comments:*

1. *The English needs to be improved. It has not been structured well. The statements and propositions have not been organized properly. Reflecting the state of the art is poor as well. The Introduction has not properly been tightened, so the problem and the purpose are not clear.*

Thank you for your suggestions. We have made a major revision to the manuscript. As you can see in the modified manuscript attached, added or subtracted some statements from the original manuscript to clarify the intentions of this work more clearly. We also included the evidential layers in the modified manuscript (please also see Figure R 1). With respect to instruction, we have re-sorted the previous researches in overcoming the non-stationary of spatial variables (especially lines 111-134 in the comparison edition attached), removed the redundant expressions to avoid repetition with later model description parts, and set more natural paragraphs to enhance the level of expression. Some expressions in the summary section have also been modified.

Besides, the English was re-checked thoroughly.

2. *In Fig. 8, two different data sets were bound together and can explicitly be separated by a horizontal line. I think there is something wrong. Perhaps it would be better that the two data sets (A and B) be gridded by the same cell size and the spatial values should not be modeled/mapped individually. You should generate a model similar to the Fig. 5.*

Thank you for your suggestion. We have added that all the raster files in this research are created with the cell size of 1 km x 1 km (lines 481-482 in the comparison edition attached). In fact, it is missing data that caused the sharp differences between the north and south parts (i.e. A and B in Fig. 5) of Fig. 8 (new Fig. 9) rather than data set

source, since we have made up a circumstance that there are no geochemical data in region B (lines 485-488 in the comparison edition attached). These expressions are cited following.

“The four independent variables described previously were also used for ILRBSWT modeling in this study (see Figs. 4 (a) to (d)), and they were uniformed in the ArcGIS grid format with a cell size of 1 km × 1 km. To demonstrate the advantages of the new method for missing data processing, we designed an artificial situation in Fig. 5, i.e., grids in region A have values for all four independent variables, while they only have values for two independent variables and no values in the two geochemical variables in region B.”

We acknowledge that the texture looks finer in Fig. 5 (new Fig. 6), and that is because this spatial variable is a continuous variable. However, as a posterior probability layer, Fig. 8 (new Fig. 9) was obtained after the discretizing and integrating the evidence layers, including the buffer layer and the geochemical anomaly layer, which can easily lead to the spatial discontinuity of the grid value. As a result, the texture looks rough, which is not caused by grid size differences.

3. *Weighted evidence layers must be added to the manuscript.*

Thank you for your suggestion and we have accepted it, please see Fig R 4 (Fig. 4 in the attached comparison), which includes all original evidential layers used in this research. Besides, as a sliding window model, ILRBSWT builds predictive model at each local window, and the discretization of original evidential layers and the determination of weights for each class are also based on the local window, thus it is impossible to show the final weights used for modeling.

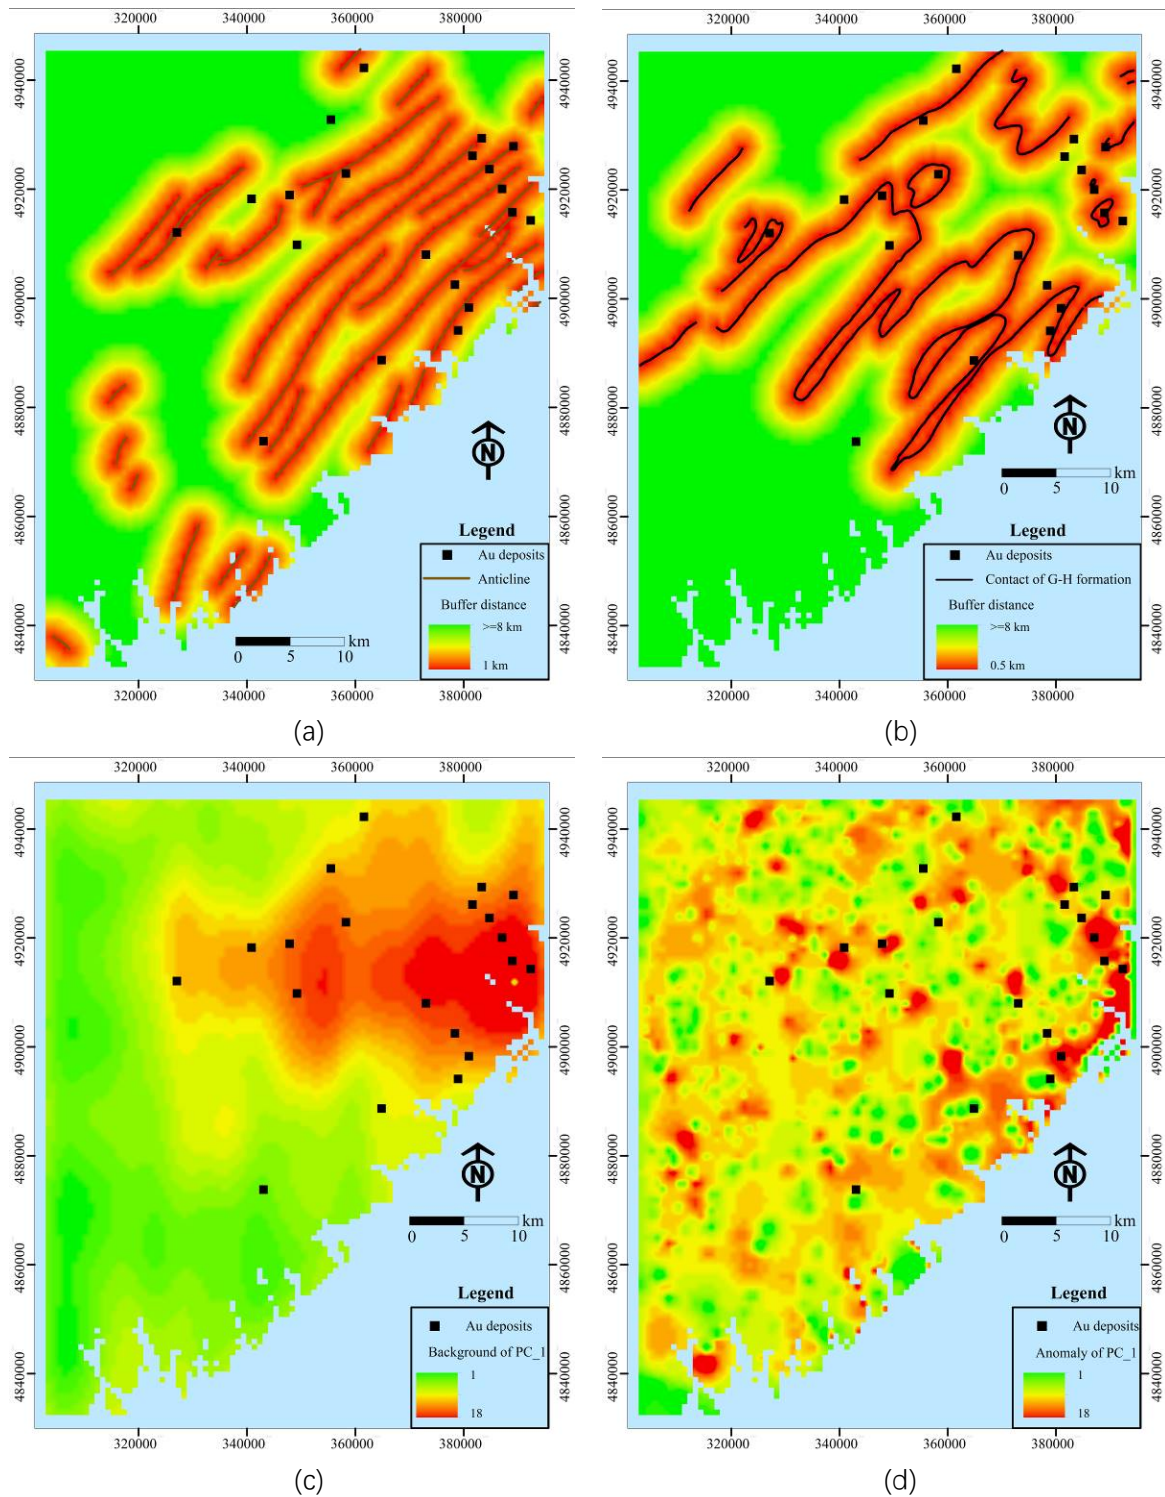

**Fig. R 1: Evidential layers used to map Au deposits in this study: buffer of anticline axes (a), buffer for the contact of Goldenville–Halifax Formation (b), and background (c) and anomaly (d) separated with the S-A filtering method based on the ore element loadings of the first component.**

4. *The manuscript presents lack of a Discussion section.*

Thank you for your suggestion and we have accepted it. We have added an individual Discussion Section in the new manuscript to discuss the findings and deficiencies of the study (lines 539-602 in the comparison edition attached). Besides, we have added more analyses and discussions in section 5.5 about the comparison of the results of different models (lines 604-638 in the comparison edition attached); please also see details as cited following:

“6 Discussion

Because of potential spatial heterogeneity, the model parameter estimates obtained based on the total equal-weight samples in the classical regression model may be biased, and they may not be applicable for predicting each local region. Therefore, it is necessary to adopt a local window model to overcome this issue. The presented case study shows that ILRBSWT can obtain better prediction results than classical logistic regression because of the former's sliding local window model, and their corresponding intersection point values are 2.85 and 2.45, respectively. However, ILRBSWT has even advantages. For example, characterizing 26% or 29% of the total study area as promising prospecting targets is too high in terms of economic considerations. If instead 10% of the total area needs is mapped as the target area, the proportions of correctly predicted known deposits obtained by ILRBSWT and logistic regression are 44% and 24%, respectively. The prediction efficiency of the former is 1.8 times larger than the latter.

In this study, we did not separately consider the influences of spatial heterogeneity, missing data, and degree of exploration weight all remain, so we cannot evaluate the impact of each factor. Instead, the main goal of this work was to provide the ILRBSWT tool, demonstrating its practicality and overall effect. Zhang et al. (2017) applied this model to mapping intermediate and felsic igneous rocks and proved the effectiveness of the ILRBSWT tool in overcoming the influence of spatial heterogeneity specifically. In addition, Agterberg and Bonham-Carter (1999) showed

that WofE has the advantage of managing missing data, and we have taken a similar strategy in ILRBSWT. We did not fully demonstrate the necessity of using exploration weight in this work, which will be a direction for future research. However, it will have little influence on the description and application of ILRBSWT tool as it is not an obligatory factor, and users can individually decide if the exploration weight should be used.

Similar to WofE and logistic regression, ILRBSWT is a data-driven method, thus it inevitably suffers the same problems as data-driven methods, e.g., the information loss caused by data discretization, and exploration bias caused by the training sample location. However, it should be noted that evidential layers are discretized in each local window instead of the total study area, which may cause less information loss. This can also be regarded as an advantage of the ILRBSWT tool. With respect to logistic regression and WofE, some researchers have proposed solutions to avoid information loss resulting from spatial data discretization by performing continuous weighting (Pu et al., 2008; Yousefi & Carranza, 2015b, 2015c, 2016), and these concepts can be incorporated into further improvements of the ILRBSWT tool in the future.”

5. *The methods applied, i.e. “weights of evidence” and “logistic regression” are data-driven MPM methods, which carry exploration bias and uncertainty resulting from using classified spatial data and location of known deposits as training sites. Please add a discussion on the disadvantages of such data-driven MPM methods. There are continuous weighting approaches using logistic functions (e.g., logistic-based weighting methods, geometric average function, continuous fuzzification method, and ...) to avoid the aforementioned uncertainty.*

Thank you for your suggestions and we have accepted them. We have included in the Discussion Section a description about the shortcomings of the data-driven MPM method, and reviewed previous efforts in overcoming the issues caused by data discretization; please see details in the third paragraph in the discussion section.



6. *The evaluation method applied could not reflect the efficiency of the two models adequately. So you can see that there is no much difference between the models. I think it would be better if you could apply a prediction-area (P-A) plot and calculate normalized density for the two models to compare them.*

Thank you for your suggestion, and we have accepted it. We applied the prediction-area (P-A) plot and normalized density in the new manuscript to replace the previous used *t*-value method for model comparison in “5.5 Comparison of the mapping results” (lines 538-558 in the comparison edition attached), as is cited following.

“To evaluate the predictive capacity of the newly developed and traditional methods, the posterior probability maps obtained through logistic regression and ILRBSWT shown in Fig. 9 (a) and 9 (b) were divided into 20 classes using the quantile method. Prediction-area (P-A) plots (Mihalasky & Bonham-Carter, 2001; Yousefi et al., 2012; Yousefi & Carranza, 2015a) were then made according to the spatial overlay relationships between Au deposits and the two classified posterior probability maps in Fig. 10 (a) and (b) respectively. In a P-A plot, the horizontal ordinate indicates the discretized classes of a map representing the occurrence of deposits. The vertical scales on the left and right sides indicate the percentage of correctly predicted deposits from the total known mineral occurrences and the corresponding percentage of the delineated target area from the total study area (Yousefi & Carranza, 2015a). As shown in Figs. 10 (a) and (b), with the decline of the posterior probability threshold for the mineral occurrence from left to right on the horizontal axis, more known deposits are correctly predicted, and meantime more areas are delimited as the target area; however, the growth in the prediction rates for deposits and corresponding occupied area are similar before the intersection point in Fig. 10 (a), while the former shows higher growth rate than the latter in Fig. 10 (b). This difference suggests that ILRBSWT can predict more known Au deposits than logistic regression for delineating targets with the same area, and indicates that the former has a higher prediction efficiency than the latter.



It would be a little inconvenient to consider the ratios of both predicted known deposits and occupied area. Mihalasky and Bonham-Carter (2001) proposed a normalized density, i.e. the ratio of the predicted rate of known deposits to its corresponding occupied area. The intersection point in a P-A plot is the crossing of two curves. The first is fitted from scatter plots of the class number of the posterior probability map and rate of predicted deposit occurrences (the “Prediction rate” curves in Fig. 10). The second is fitted according to the class number of the posterior probability map and corresponding accumulated area rate (the “Area” curves in Fig. 10). At the interaction point, the sum of the prediction rate and corresponding occupied area rate is 1; the normalized density at this point is more commonly used to evaluate the performance of a certain spatial variable in indicating the occurrence of ore deposits (Yousefi & Carranza, 2015a). The intersection point parameters for both models are given in Table 1. As shown in the table, 71% of the known deposits are correctly predicted with 29% of the total study area delineated as target area when the logistic regression is applied; if ILRBSWT is applied, 74% of the known deposits can be correctly predicted with only 26% of the total area delineated as the target area. The normalized densities for the posterior probability maps obtained from the logistic regression and ILRBSWT are 2.45 and 2.85 respectively; the latter performed significantly better than the former.”

The evaluation results supported the conclusions of this research, Please see Fig. R 2 (Fig. 10 in the comparison edition attached).

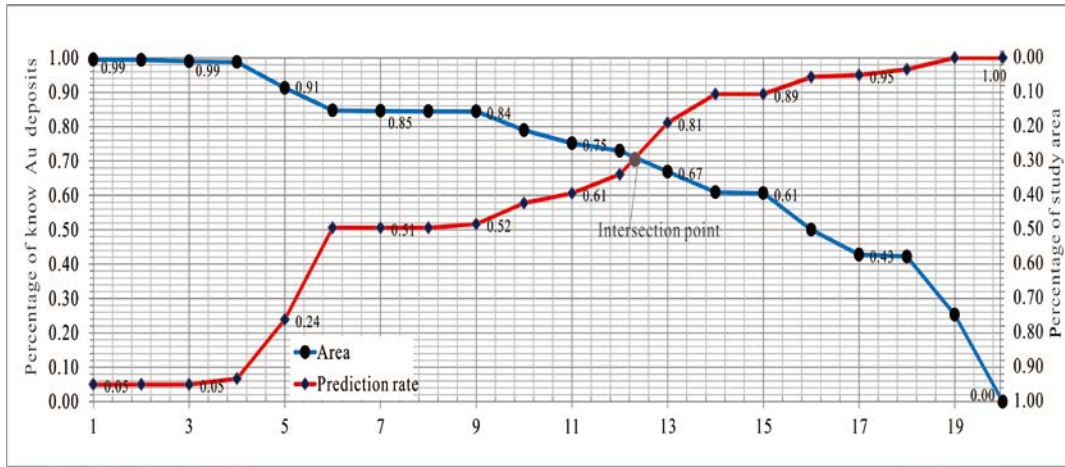

(a)

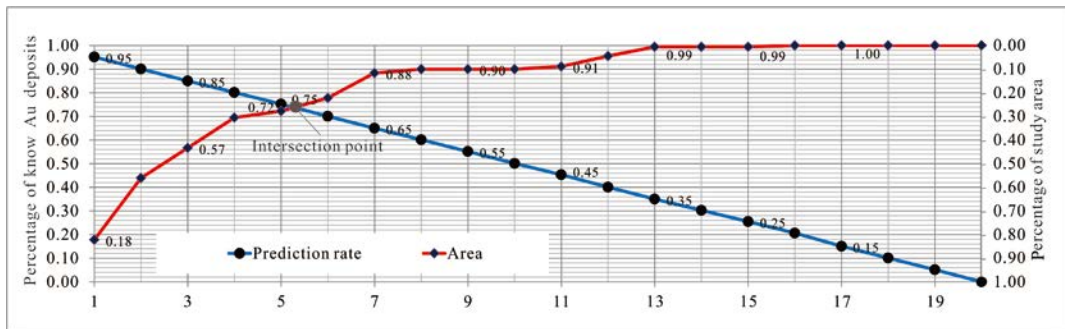

(b)

**Fig. R 2: Prediction-area (P-A) plots for discretized posterior probability maps obtained by logistic regression and ILRBSWT respectively.**

7. *The Conclusion is somewhat repetition of the text body. Please re-think about the Conclusion.*

Thank you for your comment and the conclusion has been reorganized:

“Given the problems in existing MPM models, this research provides an ILRBSWT tool. We have proven its operability and effectiveness through a case study. This research is also expected to provide a software tool support for geological exploration researchers and workers in overcoming the non-stationarity of spatial variables,

missing data, and differences in exploration degree, which should improve the efficiency of MPM work.”

1 ~~Improved~~An improved logistic regression model based on a spatially weighted technique  
2 (ILRBSWT v1.0) and its application to mineral prospectivity mapping\_

3  
4 Daojun Zhang<sup>1,2\*</sup>, Na Ren<sup>1</sup>, Xianhui Hou<sup>1\*</sup>

5 <sup>1</sup>College of Economics and Management, Northwest A&F University, Yangling 712100,  
6 China

7 <sup>2</sup>Center for Resource Economics and Environment Management, Northwest A&F University,  
8 Yangling 712100, China

9 \*Corresponding author: [cugzdj@gmail.com](mailto:cugzdj@gmail.com) (Zhang, D); [houxh1019@126.com](mailto:houxh1019@126.com) (Hou, X)

10 **Abstract:** ~~Due to complexity~~The combination of complex, multiple minerogenic stages, and  
11 mineral superposition during geological processes, ~~the has resulted in dynamic~~ spatial  
12 distributions and non-stationarity of geological variables ~~also exhibit specific trends and~~  
13 ~~non-stationarity~~. For example, geochemical elements exhibit ~~obvious~~clear spatial  
14 ~~non-stationarity~~variability and trends ~~because of the deposition of different types of~~with  
15 coverage ~~type changes~~. Thus, bias ~~may clearly~~is likely to occur under these conditions when  
16 general regression models are applied to mineral prospectivity mapping (MPM). In this study,  
17 we used a spatially weighted technique to improve general logistic regression and developed  
18 an improved model ~~called, i.e.,~~ the improved logistic regression model, based on a spatially  
19 weighted technique (ILRBSWT, version 1.0). The capabilities and advantages of ILRBSWT  
20 are as follows: (1) ~~ILRBSWT~~it is ~~essentially~~ a geographically weighted regression (GWR)  
21 model, and thus it has all ~~its~~ advantages of GWR when ~~dealing with~~managing spatial trends  
22 and non-stationarity; (2) while the current software employed for GWR mainly applies linear  
23 regression ~~whereas~~, ILRBSWT is based on logistic regression, which is ~~used~~ more commonly  
24 ~~is suitable for~~ MPM because mineralization is a binary event; (3) a missing data  
25 ~~process~~processing method borrowed from weights of evidence is included in ILRBSWT to

26 extend ~~theirs~~ adaptability when ~~dealing with~~managing multisource data; and (4) ~~in addition to~~  
27 ~~geographical distance.~~ the differences ~~of~~in data quality or exploration level can ~~also~~ be  
28 weighted in the new model ~~as well as the geographical distance.~~

29 **Keywords:** anisotropy; geographical information system modeling; geographically weighted  
30 logistic regression; mineral resource assessment; missing data; trend variable; weights of  
31 evidence.

32

### 33 **1 Introduction**

34 The main distinguishing characteristic of spatial statistics compared ~~with~~to classical statistics  
35 is that the former has a location attribute. Before ~~the development of~~geographical information  
36 systems ~~were developed~~, spatial statistical problems were often transformed into general  
37 statistical problems, where the spatial coordinates were ~~more like~~similar to a sample ID  
38 because they only had an indexing feature. However, even in non-spatial statistics, the  
39 reversal ~~paradox~~ or amalgamation paradox (Pearson et al., 1899; Yule, 1903; Simpson, 1951),  
40 which is commonly called Simpson's paradox (Blyth, 1972), has attracted ~~much~~significant  
41 attention from statisticians and other researchers. In spatial statistics, some spatial variables  
42 ~~usually~~ exhibit certain trends and ~~spatial~~ non-stationarity. Thus, it is possible for Simpson's  
43 paradox to occur when a ~~global~~classical regression model is applied, and the existence of  
44 unknown important variables may ~~make~~worsen this condition ~~even worse~~. The influence of  
45 Simpson's paradox can be fatal. For example, ~~in geology~~, due to the presence of cover and  
46 other factors that occur ~~after post~~-mineralization, ~~the~~ore-forming elements in Area I are  
47 ~~generally~~ much lower than those in Area II, ~~but~~while the actual probability of a mineral in  
48 Area I is higher than that in Area II, ~~and simply because~~ more deposits ~~may be~~were  
49 discovered in Area I (Agterberg, 1971). In this case, ~~a negative correlation will~~correlations  
50 ~~would~~ be obtained between ~~the~~ore-forming elements and ~~the~~mineralization according to the

51 classical regression model, whereas a high positive ~~correlation~~correlations can be obtained in  
52 both areas if they are separated. Simpson's paradox is an extreme case of ~~the bias~~ caused by  
53 ~~using a global model~~generated from classical models, and it is usually not so severe in  
54 practice. However, this type of ~~biased~~bias needs to be considered and ~~we should take~~  
55 needs to be taken when applying a classical regression model to a spatial problem. Several  
56 solutions to this issue have been proposed ~~previously~~, which can be divided into three types.

57 (1) Locations are introduced as direct or indirect independent variables. ~~Several studies~~  
58 ~~have employed spatial trend~~This type of model is still a global model, but space coordinates  
59 or distance weights are employed to adjust the regression estimation between the dependent  
60 variable and independent variables (Agterberg, 1964; Agterberg and Cabilio, 1969; Agterberg,  
61 1970; Agterberg and Kelly, 1971; Agterberg, 1971) ~~to express linear or nonlinear trends in~~  
62 ~~space by adding coordinate variables or their functions in predictive models. In these methods,~~  
63 ~~the locations themselves are taken as independent variables as well as the normal independent~~  
64 ~~variables;~~ Casetti, 1972; Lesage & Pace, 2009, 2011). For example, Reddy et al. (1991)  
65 performed logistic regression by including trend variables for mapping to map the base-metal  
66 potential in the Snow Lake area, Manitoba, Canada. ~~In addition, Casetti (1972) developed a ;~~  
67 Helbich & Griffith (2016) compared the spatial expansion method (SEM) to other methods in  
68 modeling the house price variation locally, where the regression parameters are themselves  
69 functions of the x and y coordinates ~~as well as~~and their combinations; Yu & Liu (2016) used  
70 the spatial lag model (SLM) and spatial error model to control spatial effects in modeling the  
71 relationship between PM<sub>2.5</sub> concentrations and per capita GDP in China.

72 (2) ~~Using local~~Local models are used to replace global models, i.e., geographically  
73 weighted models (Fotheringham et al., 2002). Geographically weighted regression (GWR) is  
74 the most popular model among the geographically weighted models. GWR ~~was~~models were  
75 first developed at the end of the 20<sup>th</sup> century by Brunson et al. (1996) and Fotheringham et al.

76 (1996, 1997, 2002) for modeling spatially heterogeneous processes, and ~~it has~~ been used  
77 widely in ~~the field of geography, geosciences~~ (e.g., [Buyantuyev & Wu, 2010](#); [Barbet-Massin et](#)  
78 [al., 2012](#); [Ma et al., 2014](#); [Brauer et al., 2015](#)).

79 (3) Reducing ~~the~~ trends in spatial variables. For example, Cheng developed a local  
80 singularity analysis technique and spectrum-area (S-A) model based on fractal/multi-fractal  
81 theory (Cheng, 1997; Cheng, 1999). These methods can remove spatial trends and  
82 ~~prevent~~mitigate the strong effects ~~on predictions~~ of the ~~original variables starting at~~ high and  
83 low values ~~of the variables on predictions~~, and thus they are used widely to weaken the effect  
84 of spatial non-stationarity ~~to some degree~~ (e.g., [ZuoZhang et al., 2016](#); [ZhangZuo et al.,](#)  
85 [2016](#); [Xiao et al., 2017](#)).

86 GWR ~~models~~ can be readily visualized and ~~understood, and it is particularly valid for~~  
87 ~~dealing with spatial non-stationarity, thus it has been used widely~~are intuitive, which have  
88 ~~made them applied~~ in geography and other ~~areas~~disciplines that require spatial data analysis.  
89 In general, GWR is a moving window-based model where instead of establishing a unique  
90 and global model for prediction, it ~~makes a prediction for~~predicts each current location using  
91 the surrounding samples, and a higher weight is given when the sample is located closer. The  
92 theoretical foundation of GWR is ~~based on~~Tobler's observation that: "everything is related to  
93 everything else, but near things are more related than distant things" (Tobler, 1970).

94 In mineral prospectivity mapping (MPM), the dependent variables are binary and  
95 logistic regression is used instead of linear regression, ~~and; therefore,~~ it is necessary to apply  
96 geographically weighted logistic regression (GWLR) instead. GWLR ~~belongs to~~is a type of  
97 geographically weighed generalized linear regression model (Fotheringham et al., 2002) ~~and~~  
98 ~~that~~ is included in the software module GWR 4.09 (Nakaya, 2016). However, ~~the function~~  
99 ~~module for~~ GWLR ~~in current software~~ can only ~~deal with the~~manage data in the form of a  
100 tabular dataset containing the fields ~~of~~with dependent and independent variables, and ~~the~~x-y



101 coordinates. Therefore, the spatial layers ~~must have to~~ be re-processed into two-dimensional  
102 tables and the resulting data needs to be transformed back into a spatial form.

103 Another problem with ~~the application of applying~~ GWR 4.09 for MPM is that it cannot  
104 ~~deal with handle~~ missing data (Nakaya, 2016). Weights of evidence (WofE) is a widely used  
105 model for MPM (Bonham-Carter et al., 1988, 1989; Agterberg, 1989; Agterberg et al., 1990),  
106 ~~which can avoid) that mitigates~~ the ~~effect effects~~ of missing data. However, WofE was  
107 developed ~~based on the premise that an assumption of assuming that~~ conditional independence  
108 is satisfied among ~~the~~ evidential layers with respect to the target layer; otherwise, the  
109 posterior probabilities will be biased, and the number of estimated deposits will ~~not be~~  
110 ~~equal unequal~~ to the known deposits. Agterberg (2011) combined WofE with logistic  
111 regression and proposed a new model that can obtain an unbiased ~~estimated of the number of~~  
112 ~~deposits as well as avoiding the effect of missing data. In the present study, this concept is~~  
113 ~~employed to deal with missing data and we propose the improved logistic regression model~~  
114 ~~based on spatially weighted technique (ILRBSWT v1.0) for MPM. The main features of~~  
115 ~~ILRBSWT include the following: (1) a spatial  $t$  statistics method (Agterberg et al., 1993) is~~  
116 ~~introduced to determine the best binary threshold for independent variables, where~~  
117 ~~binarization is performed based on a local window instead of the global level, which can~~  
118 ~~increase the effect of indicating the independent variables to the target variable; and (2) a~~  
119 ~~mask layer is included in the new model to deal with the data quality and exploration level~~  
120 ~~differences among samples. estimate of number of deposits while also avoiding the effect of~~  
121 ~~missing data. In this study, we employed Agterberg (2011) 's to account for missing data,~~

122 ~~The idea~~One more improvement of the ILRBSWT is that a mask layer is included in the  
123 new model to address data quality and exploration level differences between samples.

124 Conceptually, this research ~~is origin~~originated from the ~~first author's doctoral~~ thesis  
125 ~~(of Zhang, (2015); in Chinese),~~ which ~~has been shown to have~~showed better efficiency

Formatted: Font: 12 pt

Formatted: Font: 12 pt

126 for mapping intermediate and felsic igneous rocks (Zhang et al., 2017). ~~The contribution~~  
127 ~~of this research is to elaborate the principle~~This work elaborates on the principles of  
128 ILRBSWT, and ~~provide~~provides a detailed algorithm for its design and implementation  
129 process with the code and software module attached. In addition, ~~the processing of~~  
130 missing data is not ~~a technique covered in GWR modeling presented in prior research, and~~  
131 ~~a solution borrowed from WofE is provided in this study. Finally, ILRBSWT performance~~  
132 ~~in MPM is tested by former researches. At last, the prediction of~~predicting Au ore deposits  
133 in western Meguma Terrain, Nova Scotia, Canada, ~~is chosen as case study to show the~~  
134 ~~performance of ILRBSWT in MPM.~~

## 136 2 Models

137 Linear regression is commonly used for exploring the relationship between a response  
138 variable and one or more explanatory variables. However, in MPM and other fields, the  
139 response variable is binary or dichotomous, so linear regression is not applicable and thus a  
140 logistic model ~~can be~~is advantageous.

### 141 2.1 Logistic Regression

142 In MPM, the dependent variable( $Y$ ) is binary ~~since~~because  $Y$  can only take the value of 1 and  
143 0, ~~which means the~~indicating that mineralization occurs ~~or~~and not ~~respectively~~. Suppose that  
144  $\pi$  represents the estimation of  $Y$ ,  $0 \leq \pi \leq 1$ , then a logit transformation of  $\pi$  can be made, i.e.,

145  $\text{logit}(\pi) = \ln(\pi/(1-\pi))$ . ~~Logistic~~The logistic regression function can be obtained as  
146 ~~following follows:~~

$$147 \text{Logit } \pi(X_1, X_2, \dots, X_p) = \beta_0 + \beta_1 X_1 + \dots + \beta_p X_p \quad (1)$$

148 where  $X_1, X_2, \dots, X_p$ , comprises a sample of  $p$  explanatory variables  $x_1, x_2, \dots, x_p$ ,  $\beta_0$  is the  
149 intercept, and  $\beta_1, \beta_2, \dots, \beta_p$  are regression coefficients.

150 If there are  $n$  samples, we can obtain  $n$  linear equations with  $p+1$  unknowns based on  
 151 equation (1). Furthermore, if we suppose that the observed values for  $Y$  are  $Y_1, Y_2, \dots, Y_n$ , and  
 152 these observations are independent of each other, then a likelihood function can be  
 153 established: –

$$154 L(\beta) = \prod_{i=1}^n (\pi_i^{Y_i} (1 - \pi_i)^{1 - Y_i}), \quad (2)$$

155 where  $\pi_i = \pi(X_{i1}, X_{i2}, \dots, X_{ip}) = \frac{e^{\beta_0 + \beta_1 X_{i1} + \dots + \beta_p X_{ip}}}{1 + e^{\beta_0 + \beta_1 X_{i1} + \dots + \beta_p X_{ip}}}$ . The best estimate can be obtained ~~if~~  
 156 ~~and~~ only if equation (2) takes the maximum. Then the problem is converted into solving  
 157  $\beta_1, \beta_2, \dots, \beta_p$ . Equation (2) can be further transformed into the following log-likelihood  
 158 function:

$$159 \ln L(\beta) = \sum_{i=1}^n (Y_i \pi_i + (1 - Y_i)(1 - \pi_i)) \quad (3)$$

160 The solution can be obtained by taking the first partial derivative of  $\beta_i$  ( $i = 0$  to  $p$ ),  
 161 which should be equal to 0:

$$162 \begin{cases} f(\beta_0) = \sum_{i=0}^n (Y_i - \pi_i) X_{i0} = 0 \\ f(\beta_1) = \sum_{i=0}^n (Y_i - \pi_i) X_{i1} = 0 \\ \vdots \\ f(\beta_p) = \sum_{i=0}^n (Y_i - \pi_i) X_{ip} = 0 \end{cases} \quad (4)$$

163 where  $X_{i0} = 1$ ,  $i$  takes the value from 1 to  $n$ , and equation (4) is obtained in the form of  
 164 matrix operations.

$$165 \mathbf{X}^T(\mathbf{Y} - \boldsymbol{\pi}) = \mathbf{0} \quad (5)$$

166 The Newton iterative method can be used to solve the nonlinear equations:

$$167 \hat{\boldsymbol{\beta}}(t+1) = \hat{\boldsymbol{\beta}}(t) + \mathbf{H}^{-1} \mathbf{U}, \quad (6)$$

168 where  $\mathbf{H} = \mathbf{X}^T \mathbf{V}(t) \mathbf{X}$ ,  $\mathbf{U} = \mathbf{X}^T (\mathbf{Y} - \boldsymbol{\pi}(t))$ ,  $t$  represents the number of iterations, and  $\mathbf{V}(t)$ ,  $\mathbf{X}$ ,  
 169  $\mathbf{Y}$ ,  $\boldsymbol{\pi}(t)$ , and  $\hat{\boldsymbol{\beta}}(t)$  are obtained as follows:

$$170 \mathbf{V}(t) = \begin{pmatrix} \pi_1(t)(1 - \pi_1(t)) & & & \\ & \pi_2(t)(1 - \pi_2(t)) & & \\ & & \ddots & \\ & & & \pi_n(t)(1 - \pi_n(t)) \end{pmatrix},$$

$$171 \quad \mathbf{X} = \begin{pmatrix} X_{10} & X_{11} & \cdots & X_{1p} \\ X_{20} & X_{21} & \cdots & X_{2p} \\ \vdots & \vdots & \ddots & \vdots \\ X_{n0} & X_{n1} & \cdots & X_{np} \end{pmatrix}, \mathbf{Y} = \begin{pmatrix} Y_1 \\ Y_1 \\ \vdots \\ Y_n \end{pmatrix}, \boldsymbol{\pi}(t) = \begin{pmatrix} \pi_1(t) \\ \pi_2(t) \\ \vdots \\ \pi_n(t) \end{pmatrix}, \text{ and } \hat{\boldsymbol{\beta}}(t) = \begin{pmatrix} \hat{\beta}_1(t) \\ \hat{\beta}_2(t) \\ \vdots \\ \hat{\beta}_n(t) \end{pmatrix}.$$

172 ~~Hosmer et al. (2013) provided~~For a more ~~information about~~detailed description of the  
 173 ~~derivation from~~derivations of equations (1) to (6), see Hosmer et al. (2013).

## 174 2.2 Weighted Logistic Regression

175 In practice, vector data is ~~popularly~~often used, and sample size (area) has to be considered. In  
 176 this condition, weighted logistic regression modeling should be used instead of a general  
 177 logistic regression. ~~In addition, it~~It is also preferable to use a weighted logistic regression  
 178 model when a logical regression should be performed for large sample data, ~~since because~~  
 179 weighted logical regression can ~~greatly~~significantly reduce ~~the size of the~~matrix size and  
 180 improve ~~the~~ computational efficiency (Agterberg, 1992). Assuming that there are four binary  
 181 explanatory variable layers and the study area consists of 1000×1000 grid points, the matrix  
 182 size for normal logic regression modeling would be 10<sup>6</sup>×10<sup>6</sup>; however, if weighted logistic  
 183 regression is used, the matrix size would be 32×32 at most. ~~That is~~This condition arises  
 184 because ~~the~~ sample classification process is contained in ~~the~~ weighted logistic regression, and  
 185 all samples are classified into ~~the~~ classes ~~which own~~with the same values ~~atas the~~ dependent  
 186 and ~~each~~ independent variables. The samples with the same dependent and independent  
 187 variables form certain continuous and discontinuous patterns in space, which are called  
 188 “unique condition” units. Each unique condition unit is then treated as a sample, and the area  
 189 (grid number) for it is taken as weight in ~~the~~ weighed logistic regression. Thus, ~~infor the~~ease  
 190 ~~of~~ weighted logical regression, equations (2) to (5) in section 2.1 need to be changed ~~as~~  
 191 ~~following Equations~~to equations (7) to (10) ~~respectively~~as follows.

$$192$$

$$193 \quad L_{new}(\beta) = \prod_{i=1}^n (\pi_i^{N_i Y_i} (1 - \pi_i)^{N_i (1 - Y_i)}), \quad (7)$$

194  $\ln L_{new}(\beta) = \sum_{i=1}^n (N_i Y_i \pi_i + N_i (1 - Y_i)(1 - \pi_i))$  (8)

195 
$$\begin{cases} f_{new}(\beta_0) = \sum_{i=0}^n (Y_i - \pi_i) X_{i0} = 0 \\ f_{new}(\beta_1) = \sum_{i=0}^n (Y_i - \pi_i) X_{i1} = 0 \\ \vdots \\ f_{new}(\beta_p) = \sum_{i=0}^n (Y_i - \pi_i) X_{ip} = 0 \end{cases}$$
 (9)

196  $\mathbf{X}^T \mathbf{W} (\mathbf{Y} - \boldsymbol{\pi}) = \mathbf{0}$  (10)

197 where  $N_i$  is the weight for the  $i$ -th unique condition unit,  $i$  takes the value from 1 to  $n$ , and  $n$   
 198 is the ~~total~~ number of ~~grid points. A~~ unique condition units.  $\mathbf{W}$  is a diagonal matrix ~~which~~  
 199 ~~can be that is~~ expressed as ~~following follows~~:

200 
$$\mathbf{W} = \begin{pmatrix} N_1 & & & \\ & N_2 & & \\ & & \ddots & \\ & & & N_n \end{pmatrix}$$

201 ~~Besides~~In addition, new ~~values of~~  $\mathbf{H}$  and  $\mathbf{U}$  should be used in equation (6) to perform  
 202 Newton ~~iterative underiteration as part of the~~ weighted logistic regression, i.e.,  $\mathbf{H}_{new} =$   
 203  $\mathbf{X}^T \mathbf{W} \mathbf{W} \mathbf{V}(\mathbf{t}) \mathbf{X}$ ,  $\mathbf{U}_{new} = \mathbf{X}^T \mathbf{W} (\mathbf{Y} - \boldsymbol{\pi}(\mathbf{t}))$ .

204 *2.3 Geographically Weighted Logistic Regression*

205 GWLR is a local window-based model ~~because where~~ logistic regression is established at each  
 206 current location in ~~the~~ GWLR. The current location is changed using the moving window  
 207 technique with a loop program. ~~If we suppose~~Suppose that  $\mathbf{u}$  represents the current location,  
 208 which can be uniquely determined by a pair of column and row numbers,  $\mathbf{x}$  denotes ~~that~~ $p$   
 209 explanatory variables  $x_1, x_2, \dots, x_p$  ~~that~~ take values of  $X_1, X_2, \dots, X_p$  ~~—~~respectively, and  
 210  $\pi(\mathbf{x}, \mathbf{u})$  is the ~~estimates of YY estimate~~, i.e., the probability that  $Y$  takes a value of 1, ~~and~~ then  
 211 the following function can be obtained.

212 
$$\text{Logit } \pi(\mathbf{x}, \mathbf{u}) = \beta_0(\mathbf{u}) + \beta_1(\mathbf{u})x_1 + \beta_2(\mathbf{u})x_2 + \dots + \beta_p(\mathbf{u})x_p$$
,  
 213 (11)

214 where  $\beta_0(\mathbf{u}), \beta_1(\mathbf{u}), \dots, \beta_p(\mathbf{u})$  ~~denote~~indicate that these parameters are obtained at the  
 215 location of  $\mathbf{u}$ . ~~The~~Logit  $\pi(\mathbf{x}, \mathbf{u})$ , ~~the~~ predicted probability for the current location  $\mathbf{u}$ , can be

Formatted: English (United States)

216 obtained under the condition that the values of all ~~the~~ independent variables are known at the  
217 current location and all ~~of the~~ parameters are also calculated based on the samples within the  
218 current local window. According to equation (6) in section 2.1, the parameters for GWLR can  
219 be estimated with equation (12):

$$220 \hat{\beta}(\mathbf{u})_{t+1} = \hat{\beta}(\mathbf{u})_t + (\mathbf{X}^T \mathbf{W}(\mathbf{u}) \mathbf{V}(t) \mathbf{X})^{-1} \mathbf{X}^T \mathbf{W}(\mathbf{u}) (\mathbf{Y} - \boldsymbol{\pi}(t)) \quad (12)$$

221 where  $t$  represents the number of iterations;  $\mathbf{X}$  is a matrix ~~comprising that includes~~ the values  
222 of all ~~the~~ independent ~~variable~~ variables, and all ~~of the~~ elements in the first column are 1;  
223  $\mathbf{W}(\mathbf{u})$  is a diagonal matrix where the diagonal elements are geographical weights, which can  
224 be calculated according to distance, whereas the other elements are all 0;  $\mathbf{V}(t)$  is also a  
225 diagonal matrix and the diagonal element can be expressed as  $\pi_i(t)(1 - \pi_i(t))$ ; and  $\mathbf{Y}$  is a  
226 column vector representing the values taken by the dependent variable.

#### 227 *2.4 Improved Logistic Regression Model based on the Spatially Weighted Technique*

228 As is mentioned in the introduction section, there are primarily two improvements for  
229 ILRBSWT compared to GWLR, i.e., the capacity to manage different types of weights, and  
230 the special handling of missing data.

##### 231 2.4.1 Integration of Different Weights

232 If a diagonal element in  $\mathbf{W}(\mathbf{u})$  is only for one sample ~~(, i.e., the grid point in raster data),~~  
233 section 2.3 ~~can be seen as the is an~~ improvement ~~of on~~ section 2.1, i.e. samples are weighted  
234 according to ~~its~~ their location. If samples are first reclassified ~~firstly~~ according to the unique  
235 condition mentioned in section 2.2, and corresponding weights are then summarized  
236 according to each sample's geographical weight, we can obtain an improved logistic  
237 regression model considering both sample ~~size~~ size and geographical ~~distances~~ distance. The  
238 new model ~~can not only both~~ reflects the spatial distribution of samples, ~~but also reduce and~~  
239 reduces the matrix size, ~~and it which~~ is ~~to be~~ discussed in the following section.

240 In addition to geographic factors, ~~the degree considered in the study can affect the~~

Field Code Changed

241 representativeness of a sample, e.g., differences in the level of exploration, is also considered  
242 in this study.

243 Suppose that there are  $n$  grid points in the current local window,  $S_i$  is the  $i$ -th grid,  $W_i(g)$   
244 is the geographical weight of  $S_i$ , and  $W_i(d)$  represents the individual difference weight or  
245 non-geographical weight ~~(in~~. In some cases, there may be differences in quality or the  
246 exploration level among samples, but  $W_i(d)$  takes a value of 1 if there is no difference~~),~~  
247 where  $i$  takes a value from 1 to  $n$ . Furthermore, if we suppose that there are  $N$  unique  
248 conditions after overlaying all ~~of the~~ layers ( $N \leq n$ ) and  $C_j$  denotes the  $j$ -th unique condition  
249 unit, then we can obtain the final weight for each unique condition unit in the current local  
250 window:

$$251 W_j(t) = \sum_{i=1}^n [W_i(g) * W_i(d) * df_i], \quad (13)$$

252 where  $\begin{cases} df_i = 1 & \text{if } S_i \in C_j \\ df_i = 0 & \text{if } S_i \notin C_j \end{cases}$ ,  $i$  takes a value from 1 to  $n$ ,  $j$  takes a value from 1 to  $N$ , and

253  $W_j(t)$  represents the total weight (by combining both  $W_i(g)$  and  $W_i(d)$ ) for each unique  
254 condition unit. We can use the final weight calculated in equation (13) to replace the original  
255 weight in equation (12), which is one of the advantages~~an advantage~~ of ILRBSWT.

#### 256 2.5.4.2. Missing data processing

257 Missing data is a problem ~~existing~~ in all statistics-related research fields. In MPM, missing  
258 data are also prevalent due to ground coverage, and limitations of exploration technique and  
259 measurement accuracy. Agterberg and Bonham-Carter (1999) ~~once~~ compared the following  
260 commonly used missing data processing solutions: (1) removing variables containing missing  
261 data, (2) deleting samples with missing data, (3) using 0 to replace ~~the~~ missing data, and (4)  
262 replacing ~~the~~ missing data with the mean of the corresponding variable. From the point of  
263 utilization efficiency of~~To efficiently use~~ existing data, both (1) and (2) are clearly not good  
264 solutions ~~since~~as more data will be lost. Solution (3) is superior to (4) for missing values due

Formatted

Formatted





$$M = \frac{-W^-}{W^+ - W^-} = \frac{\ln \frac{D}{A-D} - \ln \frac{D_2}{A_2 - D_2}}{\ln \frac{D_1}{A_1 - D_1} - \ln \frac{D_2}{A_2 - D_2}} \quad (16)$$

289

### 290 3 Design of the ILRBSWT Algorithm

#### 291 3.1 Local Window Design

292 A raster data set is used for ILRBSWT modeling. With a regular grid, the distance  
 293 between any two grid points can be calculated easily and we can even obtain distance  
 294 templates within a certain window scope can be obtained, which is highly efficient for data  
 295 processing. The circle and ellipse are used for isotropic and anisotropic local window designs,  
 296 respectively.

#### 297 (1) Circular Local Window Design

298 ~~If we suppose~~ Suppose that  $W$  represents a local circular window where the minimum  
 299 bounding rectangle is  $R$ , then the geographical weights can be calculated only inside  $R$ .

300 ~~Obviously~~ Clearly, the grid points inside  $R$  but outside of  $W$  should be weighted as 0, and  
 301 the ~~weights~~ weight for the grid points with a center inside  $W$  should be calculated according to  
 302 the ~~distances between themselves and the~~ distance from its current location. ~~Because  $R$  should~~  
 303 ~~be~~ a square ~~so~~, we can also assume that there are  $n$  columns and rows in  $R$ , where  $n$  is an  
 304 odd number. If we take east and south as the orientations of the  $x$ -axis and  $y$ -axis, respectively,  
 305 and the position of the northwest corner grid is defined as  $(x = 1, y = 1)$ , then a local  
 306 rectangular coordinate system can be established and the position ~~for~~ of the current location  
 307 grid can be expressed as  $O(x = \frac{n+1}{2}, y = \frac{n+1}{2})$ . The distance between any grid inside  $W$  and

308 the current location grid can be expressed as  $d_{o-ij} = \sqrt{\left(i - \frac{n+1}{2}\right)^2 + \left(j - \frac{n+1}{2}\right)^2}$ , where  $i$  and

309  $j$  take values ranging from 1 to  $n$ . The geographical weight is a function of distance, so it is  
 310 convenient to calculate  $w_{ij}$  with  $d_{o-ij}$ . Figure 1 shows the weight template for a circular

311 local window with a half-window size of nine ~~grid points~~ grids.

|     |     |     |     |     |     |     |     |     |     |     |     |     |     |     |     |     |   |   |   |
|-----|-----|-----|-----|-----|-----|-----|-----|-----|-----|-----|-----|-----|-----|-----|-----|-----|---|---|---|
| 0   | 0   | 0   | 0   | 0   | 0   | 0   | 0   | 0   | w30 | 0   | 0   | 0   | 0   | 0   | 0   | 0   | 0 | 0 | 0 |
| 0   | 0   | 0   | 0   | 0   | w28 | w27 | w25 | w24 | w25 | w27 | w28 | 0   | 0   | 0   | 0   | 0   | 0 | 0 | 0 |
| 0   | 0   | 0   | w29 | w26 | w23 | w21 | w20 | w19 | w20 | w21 | w23 | w26 | w29 | 0   | 0   | 0   | 0 | 0 | 0 |
| 0   | 0   | w29 | w25 | w22 | w18 | w16 | w15 | w14 | w15 | w16 | w18 | w22 | w25 | w29 | 0   | 0   | 0 | 0 | 0 |
| 0   | 0   | w26 | w22 | w17 | w14 | w13 | w11 | w10 | w11 | w13 | w14 | w17 | w22 | w26 | 0   | 0   | 0 | 0 | 0 |
| 0   | w28 | w23 | w18 | w14 | w12 | w9  | w8  | w7  | w8  | w9  | w12 | w14 | w18 | w23 | w28 | 0   | 0 | 0 | 0 |
| 0   | w27 | w21 | w16 | w13 | w9  | w6  | w5  | w4  | w5  | w6  | w9  | w13 | w16 | w21 | w27 | 0   | 0 | 0 | 0 |
| 0   | w25 | w20 | w15 | w11 | w8  | w5  | w3  | w2  | w3  | w5  | w8  | w11 | w15 | w20 | w25 | 0   | 0 | 0 | 0 |
| w30 | w24 | w19 | w14 | w10 | w7  | w4  | w2  | w1  | w2  | w4  | w7  | w10 | w14 | w19 | w24 | w30 | 0 | 0 | 0 |
| 0   | w25 | w20 | w15 | w11 | w8  | w5  | w3  | w2  | w3  | w5  | w8  | w11 | w15 | w20 | w25 | 0   | 0 | 0 | 0 |
| 0   | w27 | w21 | w16 | w13 | w9  | w6  | w5  | w4  | w5  | w6  | w9  | w13 | w16 | w21 | w27 | 0   | 0 | 0 | 0 |
| 0   | w28 | w23 | w18 | w14 | w12 | w9  | w8  | w7  | w8  | w9  | w12 | w14 | w18 | w23 | w28 | 0   | 0 | 0 | 0 |
| 0   | 0   | w26 | w22 | w17 | w14 | w13 | w11 | w10 | w11 | w13 | w14 | w17 | w22 | w26 | 0   | 0   | 0 | 0 | 0 |
| 0   | 0   | w29 | w25 | w22 | w18 | w16 | w15 | w14 | w15 | w16 | w18 | w22 | w25 | w29 | 0   | 0   | 0 | 0 | 0 |
| 0   | 0   | 0   | w29 | w26 | w23 | w21 | w20 | w19 | w20 | w21 | w23 | w26 | w29 | 0   | 0   | 0   | 0 | 0 | 0 |
| 0   | 0   | 0   | 0   | 0   | w28 | w27 | w25 | w24 | w25 | w27 | w28 | 0   | 0   | 0   | 0   | 0   | 0 | 0 | 0 |
| 0   | 0   | 0   | 0   | 0   | 0   | 0   | 0   | 0   | w30 | 0   | 0   | 0   | 0   | 0   | 0   | 0   | 0 | 0 | 0 |

312

313

314

315

316

**Fig. 1** Weight template for a circular local window with a half-window size of nine grid-points/grids, where w1 to w30 represent different weight classes that decrease with distance/distances and 0 denotes/indicates that the grid is weighted as 0. Gradient colors ranging from red to green are used to distinguish the weight classes for grid points.

317

318

319

320

321

322

323

If we suppose/Suppose that there are  $T_n$  columns and  $T_m$  rows in the study area, and  $(T_i, T_j)$  represents the current location, where  $T_i$  takes values from 1 to  $T_n$  and  $T_j$  takes values from 1 to  $T_m$ , then the current local window can be established by selecting the range of rows  $T_i - \frac{n-1}{2}$  to  $T_i + \frac{n-1}{2}$  and columns  $T_j - \frac{n-1}{2}$  to  $T_j + \frac{n-1}{2}$  based on/from the total research area. Next, we can establish a local rectangular coordinate system according to the steps in the last paragraph, where the  $x$  and  $y$  coordinates for the northwest corner are defined as the coordinate origin by subtracting/previously described steps; we

324 subtract  $T_i - \frac{n-1}{2}$  and  $T_j - \frac{n-1}{2}$  from the  $x$  and  $y$  coordinates, respectively, for all of the  
 325 grid points in the range. The corresponding relationship can then be established between  
 326 the weight template and the current window. Global weights can also be included via the  
 327 matrix product between the global weight layer and local weight template within the local  
 328 window. In addition, special care should be taken when the weight template covers some area  
 329 outside the study area, i.e.,  $T_i - \frac{n-1}{2} < 0$ ,  $T_i + \frac{n-1}{2} > T_n$ ,  $T_j - \frac{n-1}{2} < 0$ , and  $T_j +$   
 330  $\frac{n-1}{2} > T_m$ .

### 331 (2) Elliptic Local Window Design

332 In most cases, the spatial weights change tendency of the spatial variable degrees  
 333 may vary with different directions and an elliptic local window may be better for  
 334 describing the changes in the weights in space. In order to simplify the calculation,  
 335 we can convert the distances in different directions into equivalent distances, and an  
 336 anisotropic problem is then becomes converted into an isotropic problem. For any grid, the  
 337 equivalent distance is the semi-major axis length of the ellipse that passes through the grid  
 338 and that is centered at the current location, where and passes through the grid, while the  
 339 parameters for the ellipse can be determined using the kriging method.

340 We still use  $W$  to represent the local elliptic window and  $a$ ,  $r$ , and  $\theta$  are defined as the  
 341 semi-major axis, the ratio of the semi-minor axis relative to the semi-major axis, and the  
 342 azimuth of the semi-major axis, respectively. Then,  $W$  can be covered by a square  $R$ , where  
 343 the whose side length is  $2a-1$  and the center is the same as  $W$ . There are  $(2a-1) \times (2a-1)$   
 344 grid points in  $R$ . We establish the rectangular coordinates as described above and we  
 345 suppose that the center of the top left grid in  $R$  is located at  $(x = 1, y = 1)$ , and thus the center  
 346 of  $W$  should be  $O(x_0 = a, y_0 = a)$ . According to the definition of the ellipse, two of the  
 347 elliptical focuses are located at  $F_1 (x_1 = a + \sin(\theta) \sqrt{a^2 - (a * r)^2}, y_1 = a -$

Formatted: Font: Italic

348  $\cos(\theta)\sqrt{a^2 - (a * r)^2}$ ) and  $F_2$  ( $x_2 = a - \sin(\theta)\sqrt{a^2 - (a * r)^2}, y_2 = a +$   
349  $\cos(\theta)\sqrt{a^2 - (a * r)^2}$ ). The summed distances between a point and the two focus points  
350 can be expressed as  $l_{ij} = \sqrt{(i - x_1)^2 + (j - y_1)^2} + \sqrt{(i - x_2)^2 + (j - y_2)^2}$ , where  $i$  and  $j$   
351 take values from 1 to  $2a - 1$ . According to the elliptical focus formula, we can decide whether  
352 a grid in  $R$  is located in  $W$ . For equation, for any grid in  $R$ , if the sum of the distances between  
353 the two focal points and a grid center is greater than  $2a$ , then the grid is located in within  $W$ ,  
354 and vice versa. For the grid points grids outside of  $W$ , the weight is assigned as 0, and we only  
355 need to calculate the equivalent distances should be calculated for the grid points grids within  
356  $W$ . As mentioned above, the parameters for the ellipse can be determined using the kriging  
357 method. In the ellipse  $W$ , where the semi-major axis is  $a$ , we keep  $r$  and  $\theta$  are maintained as  
358 constants, so then we can obtain countless ellipses centered at the center of  $W$ , and the  
359 equivalent distance is the same on the same elliptical orbit. Thus, the equivalent distance  
360 template can be obtained for the local elliptic local window. Figure 2 shows the equivalent  
361 distance templates under the conditions that  $a = 11$  grid points grids,  $r = 0.5$ , and the azimuths  
362 for the semi-major axis are  $0^\circ$ ,  $45^\circ$ ,  $90^\circ$ , and  $135^\circ$ , where the weight template can also be  
363 calculated based on Fig. 2, respectively.

Formatted: Font: Italic

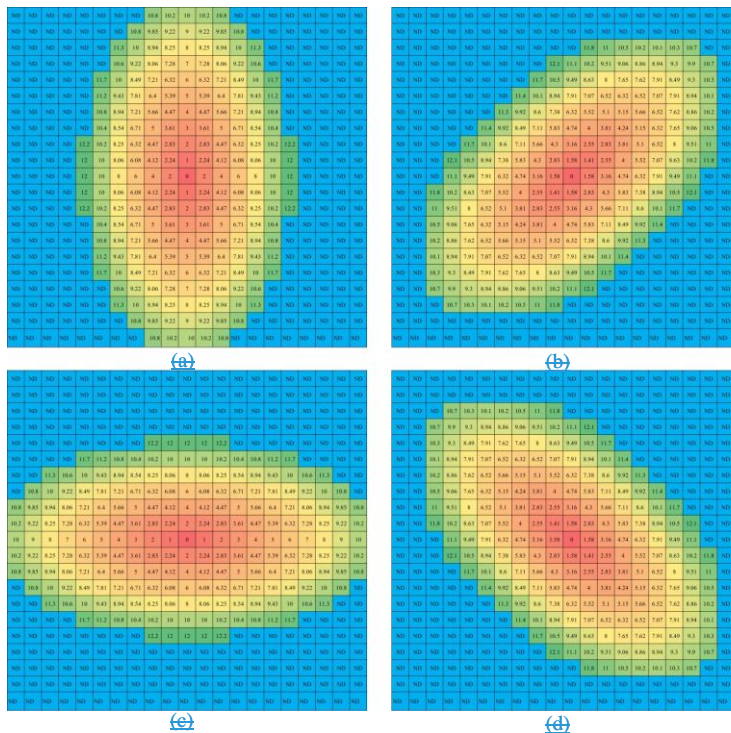

Fig. 2 Construction of the distance template based on  $a_{an}$  elliptic local window:  $a = 11$  grid points,  $r = 0.5$ , and the azimuths for the semi-major axis are  $0^\circ$  (a),  $45^\circ$ (b),  $90^\circ$  (c), and  $135^\circ$  (d) respectively.

### 3.2 Pseudocode Algorithm for ILRBSWT

The ILRBSWT method primarily focuses—mainly on two problems, i.e., spatial non-stationarity and missing data. We use the moving window technique to establish a-local models instead of a global model, which can to overcome the spatial non-stationarity better compared with the global model. The spatial  $t$ -value employed in the WofE method is used to binarize spatial variables based on the local window, which is quite different from traditional binarization based on the global range, where the missing data can be handled well because positive and negative weights are used instead of the original values of “1” and “0” values, and the missing data can then be represented well as “0.” Both the isotropy and anisotropy

378 window types are ~~possible~~provided in our new proposed model. The geographical  
379 ~~weights~~weight function and ~~the~~ window size can be determined by the users ~~themselves~~. If  
380 the geographic weights are equal and there are no missing data, ~~then~~ILRBSWT will yield the  
381 same posterior probabilities as classical logistic regression; hence, the later can be  
382 ~~treated~~viewed as a special case of the former. The core ILRBSWT algorithm is as follows.

383 Step 1. Establish a loop for all ~~of the grid points~~grids in the study area according to both  
384 the columns and rows. Determine a basic local window with a size of  $r_{\min}$  based on a variation  
385 function or other method. In addition, the maximum local window ~~with a size of  $r_{\max}$~~ is set as  
386  $r_{\max}$ , with an interval of  $\Delta R$ . ~~If we suppose~~Suppose that a geographical ~~weight~~weighted  
387 model has already been given in the form of a Gaussian curve determined ~~by~~from variations  
388 in ~~the~~geostatistics, i.e.,  $W(g) = e^{-\lambda d^2}$ , where  $d$  is the distance and  $\lambda$  is the attenuation  
389 coefficient, then we can calculate the geographical weight for any grid in the current local  
390 window. The equivalent radius should be used in the anisotropic situation. When other types  
391 of weights are considered, e.g., the degree of exploration or research, it is also necessary to  
392 synthesize the geographical weights ~~and~~with other weights (see equation ~~4013~~).

393 Step 2. Establish a loop for all ~~of the~~independent variables. In a circular (elliptical)  
394 window with a radius (equivalent radius) of  $r_{\min}$ , apply the WofE (Agterberg, 1992) model  
395 according to the grid weight determined in step 1, thereby obtaining a statistical table  
396 containing the parameters ~~of~~ $W_{ij}^+$ ,  $W_{ij}^-$  and  $t_{ij}$ , where  $i$  is the  $i$ -th independent variable  
397 and  $j$  denotes the  $j$ -th binarization.

398 Step 2.1. If a maximum  $t_{ij}$  exists and it is greater than or equal to the standard  $t$ -value  
399 (e.g., 1.96), record the values of  $W_{i-\max_t}^+$ ,  $W_{i-\max_t}^-$  and  $B_{i-\max_t}$ , which denote the  
400 positive weight, negative weight, and corresponding binarization, respectively, under the  
401 condition where  $t$  takes the maximum value. Go to step 2 and apply the WofE model to the  
402 other independent variables.



403 Step 2.2. If a maximum  $t_{ij}$  does not exist, or it is smaller than the standard  $t$ -value, go to  
404 step 3.

405 Step 3. In a circular (elliptical) window with a radius (equivalent radius) of  $r_{\max}$ , increase  
406 the current local window ~~based on radius from~~  $r_{\min}$  according to the algorithm in step 1.

407 Step 3.1. If all ~~of the~~ independent variables have already been processed, go to step 4.

408 Step 3.2. If the size of the current local window exceeds the size of  $r_{\max}$ , ~~then~~ disregard  
409 the current independent variable and go to step 2 to consider the remaining independent  
410 variables.

411 Step 3.3. Apply the WofE model according to the grid weight determined in step 1 in the  
412 current local window, ~~which has increased,~~ If a maximum  $t_{ij}$  exists and it is greater than or  
413 equal to the standard  $t$ -value, record the values of  $W_{i-\max_t}^+$ ,  $W_{i-\max_t}^-$ ,  $B_{i-\max_t}$ , and  
414  ~~$r_{\text{current}}$~~   $r_{\text{current}}$ , which ~~represents~~ represent the radius (equivalent radius) for the current local  
415 window.

416 Step 3.4. If a maximum  $t_{ij}$  does not exist or it is smaller than the standard  $t$ -value, go to  
417 step 3.

418 Step 4. Suppose that  $n_s$  independent variables ~~are remaining~~ still remain.

419 Step 4.1. If  $n_s \leq 1$ , ~~then~~ calculate the mean value for the dependent variable in the  
420 current local window with a radius size of  $r_{\max}$  and retain it as the posterior probability in the  
421 current location. In addition, set the regression coefficients for all ~~of the~~ independent variables  
422 as missing data. Go to step 6.

423 Step 4.2. If  $n_s \geq 1$ , ~~then~~ find the independent variable with the largest local window and  
424 apply the WofE model to all ~~the~~ other independent variables, ~~before recording and then update~~  
425 the values of  $W_{i-\max_t}^+$ ,  $W_{i-\max_t}^-$ , and  $B_{i-\max_t}$  ~~for this time, and then go.~~ Go to step 5.

426 Step 5. Apply the logistic regression model based on ~~the previously determined~~  
427 geographic weights, and for each independent variable: (1) use  $W_{i-\max_t}^+$  to replace all ~~of the~~

Formatted: English (United States)

Formatted: English (United States)

Formatted: English (United States)

Formatted: English (United States)

428 values that are less than or equal to  $B_{i-\max,t}$  (2) use  $W_{i-\max,t}^-$  to replace all ~~of the~~ values  
429 that are greater than  $B_{i-\max,t}$  and (3) use 0 to replace no data ("-9999"). The posterior  
430 probability and regression coefficients can then be obtained for all ~~of the~~ independent  
431 variables at the current location, and go to step 6.

432 Step 6. Take the next grid as the current location and repeat steps 2–5.

433

#### 434 **4 Interface Design**

435 ~~In addition to the improved GWLR, we developed other modeling processes, where all of the~~  
436 ~~visualization and mapping procedures are performed~~ Before performing spatially weighted  
437 ~~logistical regression with ILRBSWT 1.0, data pre-processing is performed~~ using the ArcGIS  
438 10.2 platform and GeoDAS 4.0 software. ~~The maps~~ All data are originally stored in grid  
439 format, which ~~are~~ should be transformed into ASCII files ~~based on tools included in with~~ the  
440 Arc toolbox ~~before the improved GLWR is performed in ArcGIS 10.2; after modeling with~~  
441 ILRBSWT 1.0, the result data will be transformed back into grid format

442 As shown in Fig. 3, the main interface for ~~the improved GLWR comprises ILRBSWT~~  
443 1.0 is composed of four parts.

444 The upper left part is for the layer input settings, where independent variable layers,  
445 dependent variable layers, and global weight layers should be assigned ~~if they exist~~. Layer  
446 information is shown at the upper right corner, including ~~the~~ row numbers, column numbers,  
447 grid size, ordinate origin, and the expression for missing data. The local window parameters  
448 and weight attenuation function can be defined ~~in the middle as follows~~. Using the drop-down  
449 list, we ~~can prepare~~ prepared a circle or ellipse to represent various isotropic and anisotropic  
450 spatial conditions, respectively. The corresponding window parameters should be set for each  
451 window type. For the ellipse, it is necessary to set parameters ~~comprising~~ composed of the  
452 initial length of the equivalent radius (initial major radius), ~~the~~ final length of the equivalent

453 radius (largest major radius), ~~the~~ increase in the length of the equivalent radius (growth rate),  
 454 ~~the~~ threshold of the spatial  $t$ -value used to determine the need to enlarge the window, ~~the~~  
 455 length ratio of the major and minor axes, ~~the~~ orientation of the ellipse's major axis, and ~~the~~  
 456 compensation coefficient for the sill. ~~Next, it is necessary to define the~~ We prepared different  
 457 ~~types of weight~~ attenuation function and a variety of kernel functions via the drop-down menu  
 458 ~~to provide choices to users~~, such as exponential model, logarithmic model, Gaussian model,  
 459 ~~and~~ spherical model, ~~via the drop-down menu. More and corresponding~~ parameters can be  
 460 set when a certain model is selected. The output file ~~settings are~~ defined at the bottom and  
 461 the execution button is at the lower right corner.

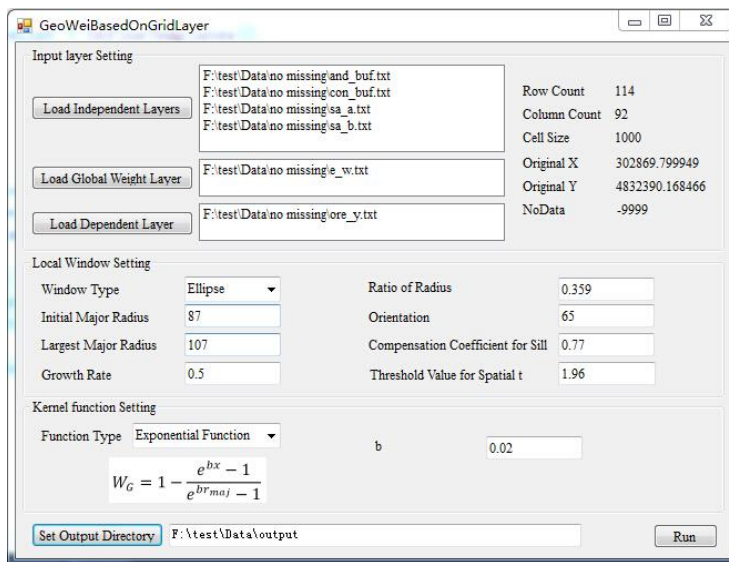

462

463

**Fig. 3 User interface design.**

464

465

466

## 467 **5 Real Data Testing**

### 468 *5.1 Data source and preprocessing*

469 The test data used in this study were obtained from the case study reported [by](#)in Cheng (2008).  
470 The study area ( $\approx 7780 \text{ km}^2$ ) ~~was~~is located in western Meguma Terrain, Nova Scotia, Canada.  
471 Four independent variables were used in the WofE model for gold mineral potential mapping  
472 by Cheng (2008), i.e., buffer of anticline axes, buffer for the contact of Goldenville–Halifax  
473 Formation, and background and anomaly separated with the S-A filtering method based on  
474 ~~the~~ore element loadings of the ~~ore elements of the~~ first component. ~~More information about~~  
475 ~~the data set can be found, as shown~~ in ~~Cheng (2008).Fig. 4.~~  
476 ~~Four~~

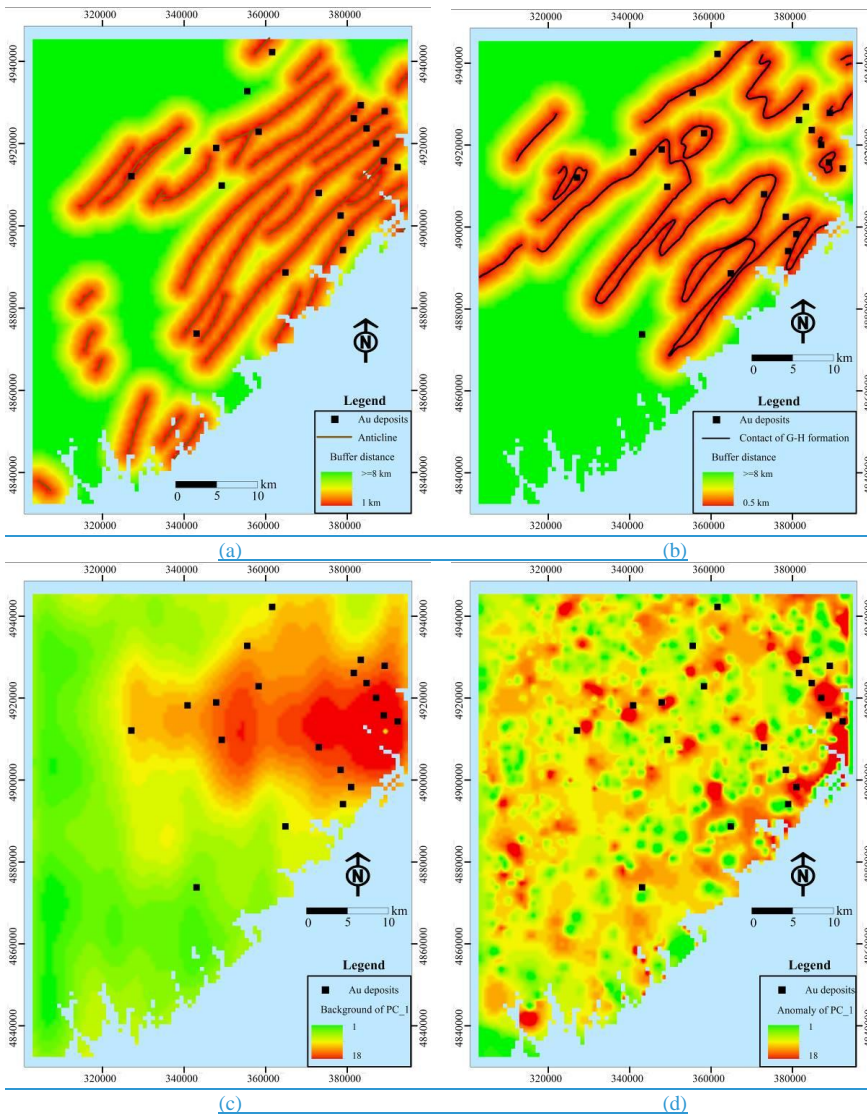

477  
 478 Fig. 4 Evidential layers used to map Au deposits in this study: buffer of anticline axes (a), buffer for  
 479 the contact of Goldenville–Halifax Formation (b), and background (c) and anomaly (d) separated  
 480 with the S-A filtering method based on the ore element loadings of the first component.

481 The four independent variables mentioned above described previously were also used for  
 482 ILRBSWT modeling in this study. In order to (see Figs. 4 (a) to (d)), and they were uniformed

483 [in the ArcGIS grid format with a cell size of 1 km × 1 km.](#) To demonstrate the advantages of  
484 the new method [when processing for missing data processing,](#) we designed [an artificial](#)  
485 [situation where the geochemical data were missing for the northern part of the study area, as](#)  
486 [shown in Fig. 4.](#) In that case, in Fig. 5, i.e., grids in region A [own have values at for](#) all of the  
487 four independent variables; [however, grids in region B, while they only own have values at for](#)  
488 two independent variables; and [they have no values in the two geochemical variables in](#)  
489 [region B.](#)

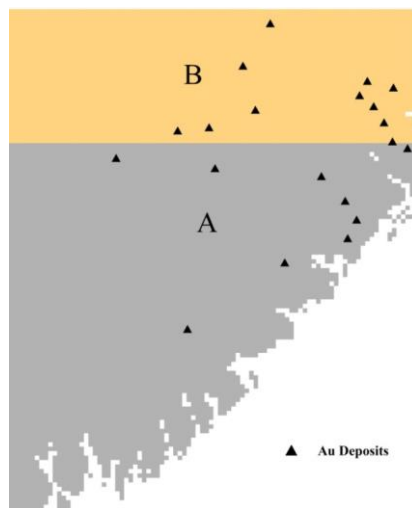

490  
491 **Fig. 4** Study area (A and B) [and the scope with where there is missing geochemical](#)  
492 [data \(in area B\).](#)

#### 493 5.2 Mapping weights for [the exploration level](#)

494 [These types of Exploration level](#) weights can be determined based on prior knowledge  
495 [according to differences in the exploration data about data quality,](#) e.g., different scales may  
496 exist throughout the whole study area. [They;](#) [however, these weights](#) can also be  
497 [obtained calculated](#) quantitatively. The density of known deposits is a good index for the  
498 exploration level, [where i.e., the degree of research is higher more comprehensive](#) when more  
499 deposits are discovered. The exploration level [weights weight layer](#) for the [mapped](#) study area

500 was obtained using the kernel density tool provided by the ArcToolbox in ArcGIS 10.2 ~~are, as~~  
501 shown in Fig. 56.

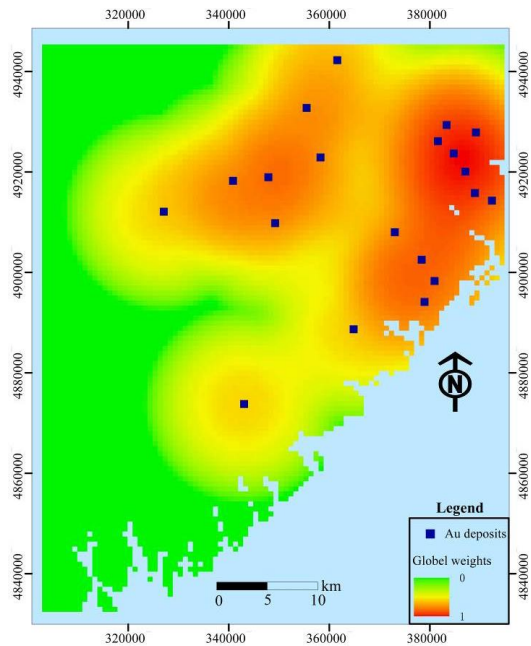

502

503 **Fig. 56** Exploration level weights.

504 5.3 Parameter Assignment ~~effor~~ local window ~~parameters and geographical weights and~~  
505 ~~weight attenuation function~~

506 ~~Empirical~~Both empirical and quantitative methods can be used to determine the local window  
507 parameters and ~~the~~attenuation function for geographical weights. The variation function in  
508 geostatistics, which is an effective method for describing the structures and trends ~~of in~~ spatial  
509 variables, ~~so it was used~~applied in this study. ~~In order to~~To calculate the variation function for  
510 ~~at the~~ dependent variable, it is necessary to first map the posterior probability using the global  
511 logistic regression method, before ~~establishing the variation function to determine~~determining  
512 the local window type and parameters- from the variation function. Variation functions  
513 ~~are were~~ established in four directions ~~in order~~ to detect anisotropic changes in space. If there



514 are no significant differences among the various directions, a circular local window can be  
 515 used for ILRBSWT, as shown in Fig. 1; otherwise, an elliptic local window should be used, as  
 516 shown in Fig. 2. The specific parameters for the local window in the study area were obtained  
 517 as shown in Fig. 67, and the final local window and geographical weight attenuation were  
 518 determined as indicated in Fig. 78 (a) and 78 (b), respectively.

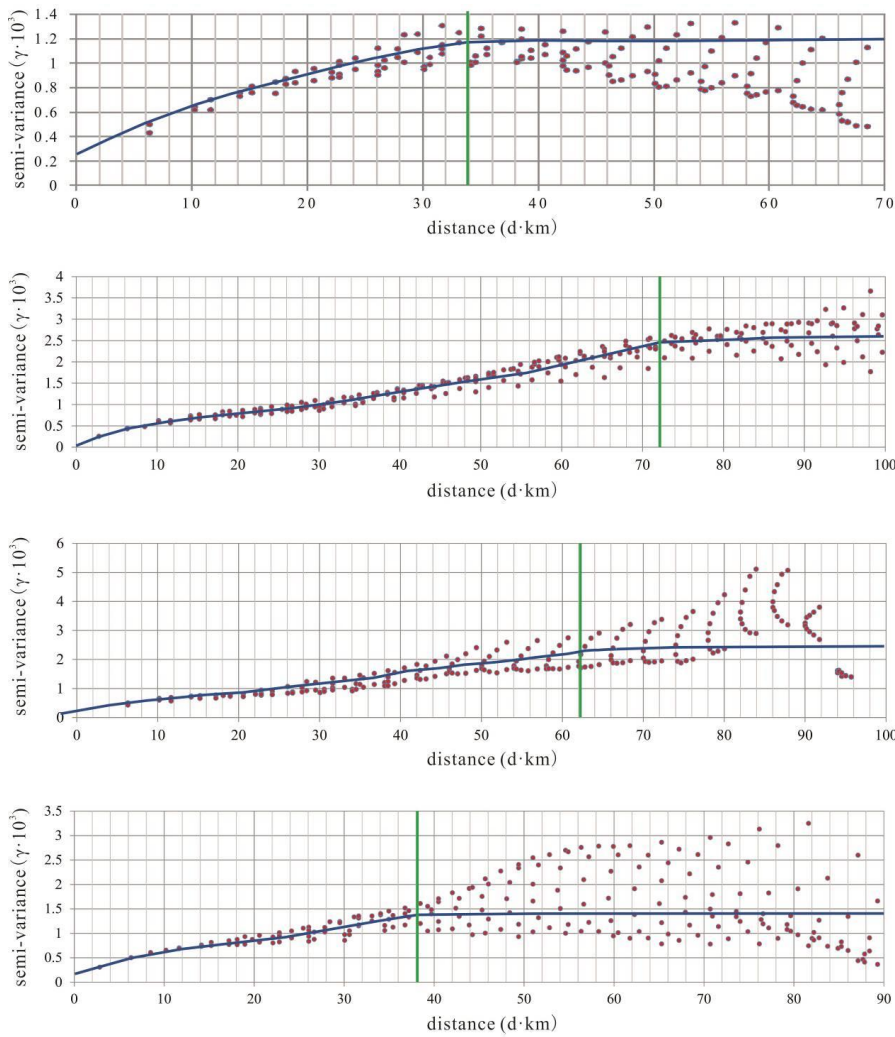

519  
 520 **Fig. 67** Experimental variogram fitting in different directions, where the green lines denote the

521 variable ranges determined for azimuths of (a) 0°, (b) 45°, (c) 90°, and (d) 135°.

522

523

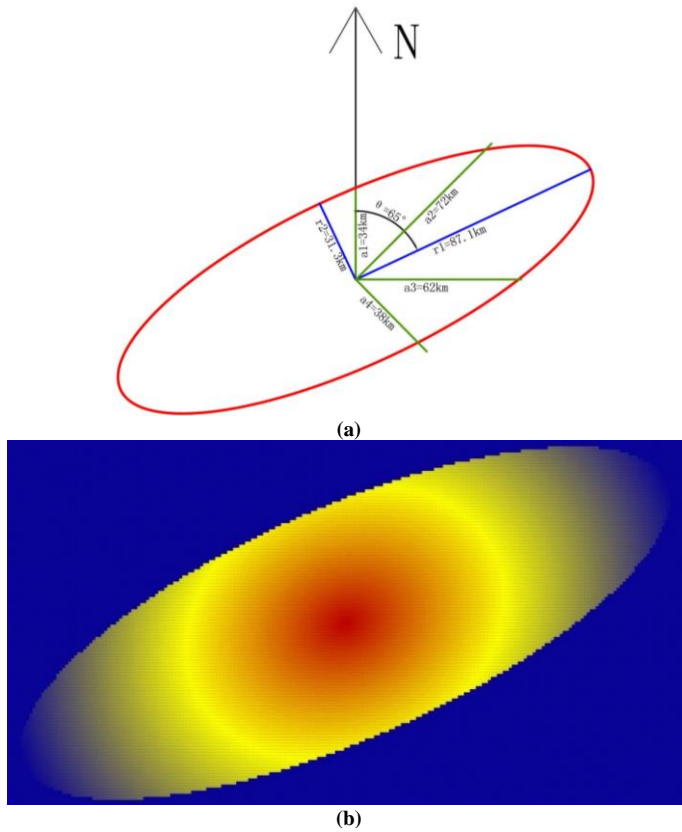

524

525 Fig. 78 Nested spherical model for different directions. The green lines in (a) correspond to those  
526 in Fig. 65, and (b) shows the geographical weight template determined based on (a).

#### 527 5.4 Data integration

528 Using the algorithm described in section 3.2, ILRBSWT was ~~performed for~~applied to  
529 the study area according to the [parameter](#) settings in Fig. 3. The estimated probability map  
530 obtained for ~~intermediate and felsic igneous rocks~~-Au deposits by ILRBSWT is shown in Fig.  
531 [89](#) (b), while Fig. [89](#) (a) presents the results obtained by logistic regression. ~~It can be seen~~

532 ~~from As shown in Fig. 8 that, ILRBSWT can better weak the effect of manages~~ missing data  
 533 than logistic regression, ~~since as~~ the Au deposits in the north part of the study area (~~where with~~  
 534 missing data ~~exist~~) ~~are well felled into~~ better fit within the region with ~~relatively~~ higher  
 535 posterior probability in Fig. 89 (b) than in Fig. 89 (a).

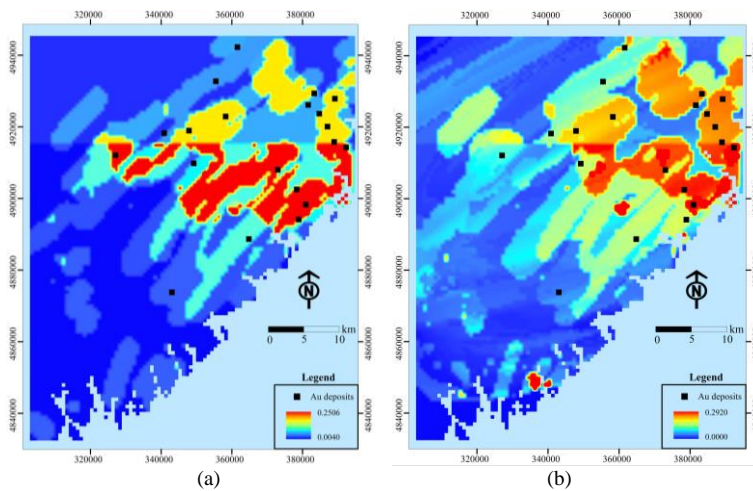

536  
 537 **Fig. 89** Posterior probability maps obtained for ~~an~~ Au ~~deposit~~ deposits by (a) logistic regression  
 538 and (b) ILRBSWT.

539 *5.5 Comparison of the mapping results*

540 ~~In order to~~ To evaluate the predictive capacity of the newly developed ~~method and the~~  
 541 traditional ~~method~~ methods, the posterior probability maps obtained ~~by through~~ logistic  
 542 regression and ILRBSWT shown in Fig. 89 (a) and 89 (b) were divided  
 543 into 20 classes ~~by using~~ the quantile method ~~and the  $t$  values~~. Prediction-area (P-A) plots  
 544 (Mihalasky & Bonham-Carter, 2001; Yousefi et al., 2012; Yousefi & Carranza, 2015a) were  
 545 then ~~calculated using~~ WoFE modeling (Fig. 9). Clearly, ILRBSWT performed better because  
 546 ~~higher  $t$  values were obtained, especially when a smaller area was delineated as the target area,~~  
 547 ~~which is much more realistic. In the northern part of the study area, the known deposits fitted~~  
 548 ~~better to the high made according to the spatial overlay relationships between Au deposits and~~

Formatted: Font: Italic

549 the two classified posterior probability area shown in Fig. 8(b) than that in Fig. 8(a), which  
 550 indicates that ILRBSWT can deal with missing data better than logistic regression.

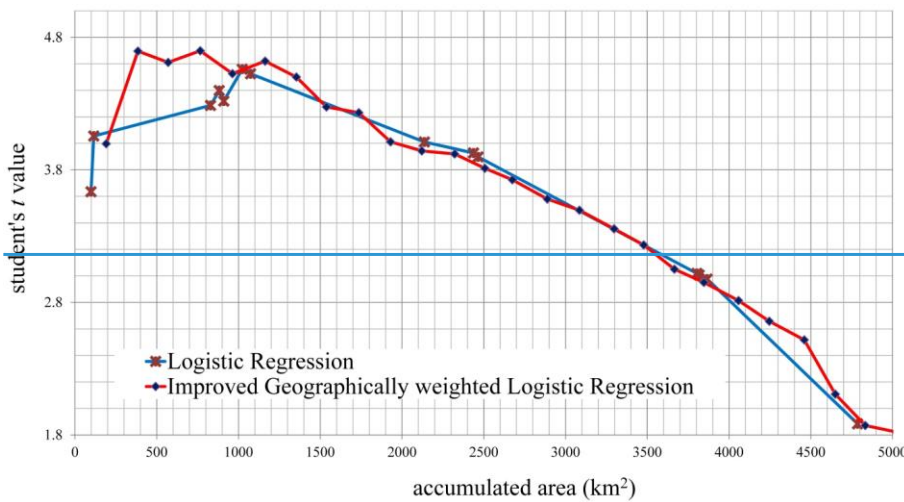

551 Fig. 9 Student's t values calculated for the spatial correlation between the known Au deposit  
 552 layer maps in Fig. 10 (a) and the (b) respectively. In a P-A plot, the horizontal ordinate  
 553 indicates the discretized classes of a map representing the occurrence of deposits. The vertical  
 554 scales on the left and right sides indicate the percentage of correctly predicted deposits from  
 555 the total known mineral occurrences and the corresponding percentage of the delineated target  
 556 area from the total study area (Yousefi & Carranza, 2015a). As shown in Figs. 10 (a) and (b),  
 557 with the decline of the posterior probability layers obtained by logistic regression and ILRBSWT  
 558 at different threshold levels.

Formatted: Font: 12 pt, Not Bold

560  
 561 **6- Conclusions**  
 562 In this study, we developed an improved GWLR model ILRBSWT based on logistic  
 563 regression, WoFE, and the current GWR model. Furthermore, a software module was  
 564 developed for ILRBSWT and a case study demonstrated its capacities for the mineral  
 565 occurrence from left to right on the horizontal axis, more known deposits are correctly

566 predicted, and advantages. Following objectives were achieved:

567 (1) A moving window technique is employed for spatial variable parameter logistic  
568 regression, which can overcome or weaken the effect of spatial non-stationarity in MPM and  
569 improve the accuracy of mineral meantime more areas are delimited as the target area;  
570 however, the growth in the prediction-

571 (2) The variogram model in geostatistics is used to determine the spatial anisotropic  
572 parameters- rates for deposits and corresponding occupied area are similar before the  
573 intersection point in Fig. 10 (a), while the former shows higher growth rate than the latter in  
574 Fig. 10 (b). This difference suggests that ILRBSWT can predict more known Au deposits than  
575 logistic regression for delineating targets with the same area, and geographical weight  
576 attenuation model, which makes the local window parameter design more objective and  
577 tenable indicates that the former has a higher prediction efficiency than the latter.

578 It would be a little inconvenient to consider the ratios of both predicted known deposits  
579 and occupied area. Mihalasky and Bonham-Carter (2001) proposed a normalized density, i.e.  
580 the ratio of the predicted rate of known deposits to its corresponding occupied area. The  
581 intersection point in a P-A plot is the crossing of two curves. The first is fitted from scatter  
582 plots of the class number of the posterior probability map and rate of predicted deposit  
583 occurrences (the "Prediction rate" curves in Fig. 10). The second is fitted according to the  
584 class number of the posterior probability map and corresponding accumulated area rate (the  
585 "Area" curves in Fig. 10). At the interaction point, the sum of the prediction rate and  
586 corresponding occupied area rate is 1; the normalized density at this point is more commonly  
587 used to evaluate the performance of a certain spatial variable in indicating the occurrence of  
588 ore deposits (Yousefi & Carranza, 2015a). The intersection point parameters for both models  
589 are given in Table 1. As shown in the table, 71% of the known deposits are correctly predicted  
590 with 29% of the total study area delineated as target area when the logistic regression is

Formatted: Indent: First line: 0 ch

591 [applied; if ILRBSWT if applied, 74% of the known deposits can be correctly predicted with](#)  
 592 [only 26% of the total area delineated as the target area. The normalized densities for the](#)  
 593 [posterior probability maps obtained from the logistic regression and ILRBSWT are 2.45 and](#)  
 594 [2.85 respectively; the latter performed significantly better than the former.](#)

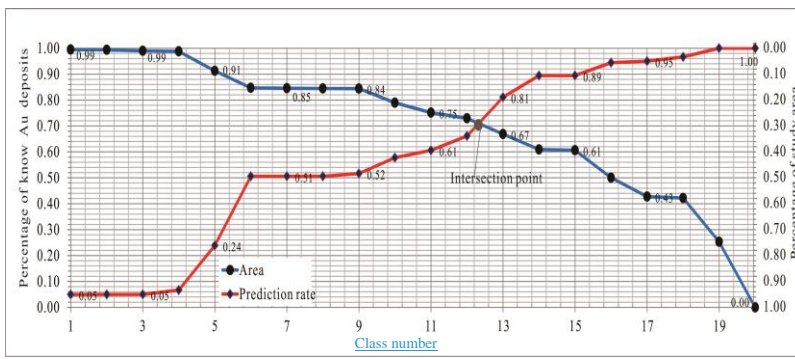

(a)

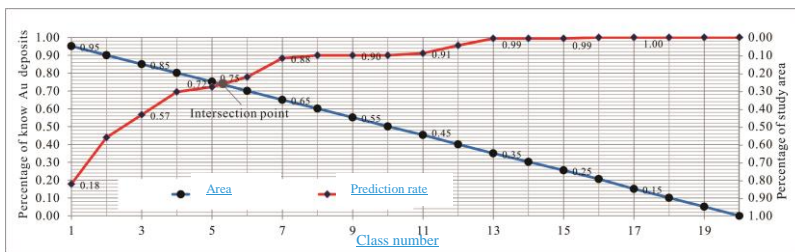

(b)

595  
 596 **Fig. 10 Prediction-area (P-A) plots for discretized posterior probability maps obtained by**  
 597 **logistic regression and ILRBSWT respectively.**

598 **Table 1. Parameters extracted from the intersection points in Figs. 10 (a) and (b).**

| Model               | Prediction rate | Occupied area | Normalized density |
|---------------------|-----------------|---------------|--------------------|
| Logistic regression | 0.71            | 0.29          | 2.45               |
| ILRBSWT             | 0.74            | 0.26          | 2.85               |

599 ~~(3) The spatial  $t$  statistics method based on WofE is introduced to perform~~  
 600 ~~binarization/discretization for the independent variables in each local window, and the new~~

601 ~~model can better handle missing data.~~

602 ~~(4) The global weight layer in ILRBSWT can reflect differences in the data quality or~~  
603 ~~exploration level well.~~

## 605 6 Discussion

606 Because of potential spatial heterogeneity, the model parameter estimates obtained based  
607 on the total equal-weight samples in the classical regression model may be biased, and they  
608 may not be applicable for predicting each local region. Therefore, it is necessary to adopt a  
609 local window model to overcome this issue. The presented case study shows that ILRBSWT  
610 can obtain better prediction results than classical logistic regression because of the former's  
611 sliding local window model, and their corresponding intersection point values are 2.85 and  
612 2.45, respectively. However, ILRBSWT has even advantages. For example, characterizing 26%  
613 or 29% of the total study area as promising prospecting targets is too high in terms of  
614 economic considerations. If instead 10% of the total area needs is mapped as the target area,  
615 the proportions of correctly predicted known deposits obtained by ILRBSWT and logistic  
616 regression are 44% and 24%, respectively. The prediction efficiency of the former is 1.8 times  
617 larger than the latter.

618 In this study, we did not separately consider the influences of spatial heterogeneity,  
619 missing data, and degree of exploration weight all remain, so we cannot evaluate the impact  
620 of each factor. Instead, the main goal of this work was to provide the ILRBSWT tool,  
621 demonstrating its practicality and overall effect. Zhang et al. (2017) applied this model to  
622 mapping intermediate and felsic igneous rocks and proved the effectiveness of the ILRBSWT  
623 tool in overcoming the influence of spatial heterogeneity specifically. In addition, Agterberg  
624 and Bonham-Carter (1999) showed that WofE has the advantage of managing missing data,  
625 and we have taken a similar strategy in ILRBSWT. We did not fully demonstrate the necessity

626 [of using exploration weight in this work, which will be a direction for future research.](#)  
627 [However, it will have little influence on the description and application of ILRBSWT tool as](#)  
628 [it is not an obligatory factor, and users can individually decide if the exploration weight](#)  
629 [should be used.](#)

630 [Similar to WofE and logistic regression, ILRBSWT is a data-driven method, thus it](#)  
631 [inevitably suffers the same problems as data-driven methods, e.g., the information loss caused](#)  
632 [by data discretization, and exploration bias caused by the training sample location. However,](#)  
633 [it should be noted that evidential layers are discretized in each local window instead of the](#)  
634 [total study area, which may cause less information loss. This can also be regarded as an](#)  
635 [advantage of the ILRBSWT tool. With respect to logistic regression and WofE, some](#)  
636 [researchers have proposed solutions to avoid information loss resulting from spatial data](#)  
637 [discretization by performing continuous weighting \(Pu et al., 2008; Yousefi & Carranza,](#)  
638 [2015b, 2015c, 2016\), and these concepts can be incorporated into further improvements of the](#)  
639 [ILRBSWT tool in the future.](#)

## 641 **7 Conclusions**

642 [Given the problems in existing MPM models, this research provides an ILRBSWT tool.](#)  
643 [We have proven its operability and effectiveness through a case study. This research is also](#)  
644 [expected to provide a software tool support for geological exploration researchers and](#)  
645 [workers in overcoming the non-stationarity of spatial variables, missing data, and differences](#)  
646 [in exploration degree, which should improve the efficiency of MPM work.](#)

### 648 ***Code availability***

649 The software tool ILRBSWT v1.0 in this research ~~is~~was developed ~~by~~-using C#, and the main  
650 codes and key functions are prepared in [the](#) file “Codes & Key Functions”. The executable



651 program files are placed in the folder “Executable Programs for ILRBSWT”. Please find them  
652 in gmd-2017-278-supplement.zip.

653

#### 654 **Data availability**

655 The data used in this research is sourced from the demo data ~~offor~~ GeoDAS software  
656 (<http://www.yorku.ca/yul/gazette/past/archive/2002/030602/current.htm>), ~~and this data~~  
657 ~~is~~which was also used by Cheng (2008). All spatial layers used in this work ~~is~~are included in  
658 the folder “Original Data” in the format of ~~an~~ ASCII file, which ~~can be~~is also found in  
659 gmd-2017-278-supplement.zip.

660

#### 661 **Acknowledgments**

662 This study benefited from joint financial support ~~by~~from the Programs of National Natural  
663 Science Foundation of China (Nos. 41602336 and 71503200), China Postdoctoral Science  
664 Foundation (Nos. ~~2016M592840 and~~2017T100773 ~~and~~2016M592840), Shaanxi Provincial  
665 Natural Science Foundation (No. 2017JQ7010), and ~~the~~Fundamental Research ~~Funds for the~~  
666 ~~Central Universities~~from Northwest A&F University in 2017 (No. 2017RWYB08). The first  
667 author thanks former supervisor Drs. Qiuming Cheng and Frits Agterberg for ~~fruitful~~  
668 discussions ~~about~~of spatial weights and ~~for~~ providing constructive suggestions.

669

670

#### 671 **References**

- 672 Agterberg, F.P., & Cabilio, P., 1969. Two-stage least-squares model for the relationship between mappable geological  
673 variables. *Journal of the International Association for Mathematical Geology*, 1(2), 137-153.
- 674 Agterberg, F.P., & Kelly, A.M., 1971. Geomathematical methods for use in prospecting. *Canadian Mining Journal*, 92(5),  
675 61-72.
- 676 Agterberg, F.P., 1964. Methods of trend surface analysis. *Colorado School Mines Quart*, 59(4), 111-130.
- 677 Agterberg, F.P., 1970. Multivariate prediction equations in geology. *Journal of the International Association for*  
678 *Mathematical Geology*, 1970 (02), 319-324.

679 Agterberg, F.P., 1971. A probability index for detecting favourable geological environments. Canadian Institute of Mining  
680 and Metallurgy, 10, 82-91.

681 Agterberg, F.P., 1989. Computer Programs for Mineral Exploration. Science, 245, 76 – 81.

682 Agterberg, F.P., 1992. Combining indicator patterns in weights of evidence modeling for resource evaluation. Nonrenewal  
683 Resources, 1(1), 35–50.

684 Agterberg, F.P., 2011. A Modified WofE Method for Regional Mineral Resource Estimation. Natural Resources Research,  
685 20(2), 95-101.

686 Agterberg, F.P., Bonham-Carter, G.F., & Wright, D.F., 1990. Statistical Pattern Integration for Mineral Exploration. in Gaál,  
687 G., Merriam, D. F., eds. Computer Applications in Resource Estimation Prediction and Assessment of Metals and  
688 Petroleum. New York: Pergamon Press: 1-12.

689 Agterberg, F.P., Bonham-Carter, G.F., Cheng, Q., & Wright, D.F., 1993. Weights of evidence modeling and weighted  
690 logistic regression for mineral potential mapping. Computers in geology, 25, 13-32.

691 [Barbet-Massin, M., Jiguet, F., Albert, C.H., & Thuiller, W., 2012. Selecting pseudo-absences for species distribution](#)  
692 [models: how, where and how many?. Methods in Ecology & Evolution, 3\(2\), 327-338.](#)

693 Blyth, C.R., 1972. On Simpson's paradox and the sure-thing principle. Journal of the American Statistical  
694 Association, 67(338), 364-366.

695 [Brauer, M., Freedman, G., Frostad, J., Van Donkelaar, A., Martin, R.V., Dentener, F., ... & Balakrishnan, K., 2015. Ambient](#)  
696 [air pollution exposure estimation for the global burden of disease 2013. Environmental science & technology, 50\(1\),](#)  
697 [79-88.](#)

698 [Brunsdon, C., Fotheringham, A.S., & Charlton, M.E., 1996. Geographically weighted regression: a method for exploring](#)  
699 [spatial nonstationarity. Geographical analysis, 28\(4\), 281-298.](#)

700 Bonham-Carter, G.F., Agterberg, F.P., & Wright, D.F., 1988. Integration of Geological Datasets for Gold Exploration in  
701 Nova Scotia. Photogrammetric Engineering & Remote Sensing, 54(11), 1585-1592.

702 Bonham-Carter, G.F., Agterberg, F.P., & Wright, D.F., 1989. Weights of Evidence Modelling: A New Approach to Mapping  
703 Mineral Potential. In Agterberg F P and Bonham-Carter G F, eds. Statistical Applications in the Earth Sciences, 171-183.

704 [Buyantuyev, A., & Wu, J., 2010. Urban heat islands and landscape heterogeneity: linking spatiotemporal variations in surface](#)  
705 [temperatures to land-cover and socioeconomic patterns. Landscape Ecology, 25\(1\), 17-33.](#)

706 [Brunsdon, C., Fotheringham, A.S., & Charlton, M.E., 1996. Geographically weighted regression: a method for exploring](#)  
707 [spatial nonstationarity. Geographical analysis, 28\(4\), 281-298.](#)

708 Casetti, E., 1972. Generating models by the expansion method: applications to geographic research. Geographical Analysis, 4,  
709 81-91.

710 Cheng, Q., 1997. Fractal/multifractal modeling and spatial analysis, keynote lecture in proceedings of the international  
711 mathematical geology association conference, 1, 57-72.

712 Cheng, Q., 1999. Multifractality and spatial statistics. Computers & Geosciences, 25, 949–961.

713 Cheng, Q., 2008. Non-Linear Theory and Power-Law Models for Information Integration and Mineral Resources  
714 Quantitative Assessments. Mathematical Geosciences, 40(5), 503-532.

715 Fotheringham, A.S., Brunsdon, C., & Charlton, M.E., 1996. The geography of parameter space: an investigation of spatial  
716 non-stationarity. International Journal of Geographical Information Systems, 10, 605-627.

717 Fotheringham, A.S., Brunsdon, C., & Charlton, M.E., 2002. Geographically Weighted Regression: the analysis of spatially  
718 varying relationships, Chichester: Wiley.

719 Fotheringham, A.S., Charlton, M.E., & Brunsdon, C., 1997. Two techniques for exploring nonstationarity in geographical  
720 data. Geographical Systems, 4, 59-82.

721 [Hao, Y., & Liu, Y., 2016. The influential factors of urban pm 2.5, concentrations in china: aspatial econometric analysis.](#)  
722 [Journal of Cleaner Production, 112, 1443-1453.](#)

723 [Helbich, M., & Griffith, D.A., 2016. Spatially varying coefficient models in real estate: eigenvector spatial filtering and](#)  
724 [alternative approaches. Computers Environment & Urban Systems, 57, 1-11.](#)

725 Hosmer, D.W., Lemeshow, S, & Sturdivant, R.X., 2013. Applied logistic regression, 3rd edn. Wiley, New York

726 [LeSage, J.P., & Pace, R.K., 2009. Introduction to spatial econometrics. Chapman and Hall/CRC.](#)

727 [Lesage, J.P., & Pace, R.K., 2011. Pitfalls in higher order model extensions of basic spatial regression methodology. Review](#)  
728 [of Regional Studies, 41\(1\), 13-26.](#)

729 [Ma, Z., Hu, X., Huang, L., Bi, J., & Liu, Y., 2014. Estimating ground-level PM2.5 in China using satellite remote sensing.](#)  
730 [Environmental science & technology, 48\(13\), 7436-7444.](#)

731 [Mihalasky, M.J., & Bonham-Carter, G.F., 2001. Lithodiversity and its spatial association with metallic mineral sites, great](#)  
732 [basin of nevada. Natural Resources Research, 10\(3\), 209-226.](#)

733 Nakaya, T., 2016. GWR4.09 user manual. WWW Document. Available online:  
734 [https://raw.githubusercontent.com/gwrtools/gwr4/master/GWR4manual\\_409.pdf](https://raw.githubusercontent.com/gwrtools/gwr4/master/GWR4manual_409.pdf) (accessed on 16 February 2017).

735 Pearson, K., Lee, A., & Bramley-Moore, L., 1899. Mathematical contributions to the theory of evolution. VI. Genetic  
736 (reproductive) selection: Inheritance of fertility in man, and of fecundity in thoroughbred racehorses. Philosophical  
737 Transactions of the Royal Society of London. Series A, Containing Papers of a Mathematical or Physical Character, 192,  
738 257-330.

739 [Pu, L., Zhao, P., Hu, G., Xia, Q., & Zhang, Z., 2008. The extended weights of evidence model using both continuous and](#)  
740 [discrete data in assessment of mineral resources gis-based. Geological Science & Technology Information, 27\(6\), 102-106](#)  
741 [\(in Chinese with English abstract\).](#)

742 Reddy, R.K.T., Agterberg, F.P., & Bonham-Carter, G.F., 1991. Application of GIS-based logistic models to base-metal  
743 potential mapping in Snow Lake area, Manitoba. Proceedings of the Canadian Conference on GIS, 18-22.

744 Simpson, E.H., 1951. The interpretation of interaction in contingency tables. Journal of the Royal Statistical Society. Series B  
745 (Methodological), 238-241.

746 Tobler, W.R., 1970. A computer movie simulating urban growth in the Detroit region. Economic Geography, 46(2), 234-24.

747 Xiao, F., Chen, J., Hou, W., Wang, Z., Zhou, Y., & Erten, O., 2017. A spatially weighted singularity mapping method  
748 applied to identify epithermal Ag and Pb-Zn polymetallic mineralization associated geochemical anomaly in Northwest  
749 Zhejiang, China. Journal of Geochemical Exploration.

750 [Yousefi, M., & Carranza, E.J.M., 2015a. Prediction-area \(P-A\) plot and C-A fractal analysis to classify and evaluate](#)  
751 [evidential maps for mineral prospectivity modeling. Computers & Geosciences, 79, 69-81.](#)

752 [Yousefi, M., & Carranza, E.J.M., 2015b. Fuzzification of continuous-value spatial evidence for mineral prospectivity](#)  
753 [mapping. Computers & Geosciences, 74, 97-109.](#)

754 [Yousefi, M., & Carranza, E.J.M., 2015c. Geometric average of spatial evidence data layers: a GIS-based multi-criteria](#)  
755 [decision-making approach to mineral prospectivity mapping. Computers & Geosciences, 83, 72-79.](#)

756 [Yousefi, M., Kamkar-Rouhani, A., & Carranza, E.J.M., 2012. Geochemical mineralization probability index \(GMPI\): a new](#)  
757 [approach to generate enhanced stream sediment geochemical evidential map for increasing probability of success in](#)  
758 [mineral potential mapping. Journal of Geochemical Exploration, 115\(2\), 24-35.](#)

759 Yule, G.U., 1903. Notes on the theory of association of attributes in statistics. Biometrika, 2(2), 121-134.

760 Zhang, D., 2015. Spatially Weighted technology for Logistic regression and its Application in Mineral Prospectivity  
761 Mapping (Dissertation). China University of Geosciences, Wuhan (in Chinese with English abstract).

762 Zhang, D., Cheng, Q., & Agterberg, F.P., 2017. Application of spatially weighted technology for mapping intermediate and  
763 felsic igneous rocks in fujian province, china. Journal of Geochemical Exploration, 178, 55-66.

764 Zhang, D., Cheng, Q., Agterberg, F.P., & Chen, Z., 2016. An improved solution of local window parameters setting for local  
765 singularity analysis based on excel vba batch processing technology. Computers & Geosciences, 88(C), 54-66.

766 Zuo, R., Carranza, E.J.M., & Wang, J., 2016. Spatial analysis and visualization of exploration geochemical  
767 data. Earth-Science Reviews, 158, 9-18.
